1 The AEGEAN-169 clade of bacterioplankton is synonymous with SAR11  
2 subclade V (HIMB59) and metabolically distinct

3  
4  
5  
6  
7  
8  
9

Eric W. Getz<sup>1</sup>, V. Celeste Lanclos<sup>1</sup>, Conner Y. Kojima<sup>1</sup>, Chuankai Cheng<sup>1</sup>, Michael W. Henson<sup>2</sup>,  
Max Emil Schön<sup>3</sup>, Thijs J. G. Ettema<sup>4</sup>, Brant C. Faircloth<sup>5</sup>, J. Cameron Thrash<sup>1,#</sup>

10 <sup>1</sup>*Department of Biological Sciences, University of Southern California, Los Angeles, CA 90089,*  
11 *USA*

12 <sup>2</sup>*Department of Geophysical Sciences, University of Chicago, Chicago, IL 60637, USA*

13 <sup>3</sup>*Department of Cell and Molecular Biology, Science for Life Laboratory, Uppsala University,*  
14 *Uppsala, Sweden*

15 <sup>4</sup>*Laboratory of Microbiology, Wageningen University and Research, Wageningen, The*  
16 *Netherlands*

17 <sup>5</sup>*Department of Biological Sciences and Museum of Natural Science, Louisiana State University,*  
18 *Baton Rouge, LA 70803, USA*

19  
20

21 #Correspondence: [thrash@usc.edu](mailto:thrash@usc.edu)

22  
23  
24

25 Running title: *Pangenomics of AEGEAN-169 bacterioplankton*

26  
27

Keywords: comparative genomics, SAR11, AEGEAN-169, HIMB59, bacterioplankton

## 28 **ABSTRACT**

29 Bacterioplankton of the SAR11 clade are the most abundant marine microorganisms and consist  
30 of numerous subclades spanning Order level divergence (*Pelagibacterales*). The assignment of the  
31 earliest diverging subclade V (a.k.a. HIMB59) to the *Pelagibacterales* is highly controversial, with  
32 multiple recent phylogenetic studies placing them completely separate from SAR11. Other than  
33 through phylogenomics, subclade V has not received detailed examination due to limited genomes  
34 from this group. Here, we assessed the ecogenomic characteristics of subclade V to better  
35 understand the role of this group in comparison to the *Pelagibacterales*. We used a new isolate  
36 genome, recently released single amplified genomes (SAGs) and metagenome-assembled  
37 genomes (MAGs), and previously established SAR11 genomes to perform a comprehensive  
38 comparative genomics analysis. We paired this analysis with recruitment of metagenomes  
39 spanning open ocean, coastal, and brackish systems. Phylogenomics, average amino acid identity,  
40 and 16S rRNA gene phylogeny indicate that SAR11 subclade V is synonymous with the ubiquitous  
41 AEGEAN-169 clade, and support the contention that this group represents a taxonomic Family.  
42 AEGEAN-169 shared many bulk genome qualities with SAR11, such as streamlining and low GC  
43 content, but genomes were generally larger. AEGEAN-169 had overlapping distributions with  
44 SAR11 but was metabolically distinct from SAR11 in its potential to transport and utilize a broader  
45 range of sugars as well as in transport of trace metals and thiamin. Thus, regardless of the ultimate  
46 phylogenetic placement of AEGEAN-169, these organisms have distinct metabolic capacities that  
47 likely allow them to differentiate their niche from canonical SAR11 taxa.

## 48 49 **IMPORTANCE**

50 One goal of marine microbiologists is to uncover the roles various microorganisms are playing in  
51 biogeochemical cycles. Success in this endeavor relies on differentiating groups of microbes and  
52 circumscribing their relationships. An early-diverging group (subclade V) of the most abundant  
53 bacterioplankton, SAR11, has recently been proposed as a separate lineage that does not share a  
54 most recent common ancestor. But beyond phylogenetics, little has been done to evaluate how  
55 these organisms compare with SAR11. Our work leverages dozens of new genomes to demonstrate  
56 the similarities and differences between subclade V and SAR11. In our analysis, we also establish  
57 that subclade V is synonymous with a group of bacteria established from 16S rRNA gene  
58 sequences, AEGEAN-169. Subclade V/AEGEAN-169 has clear metabolic distinctions from  
59 SAR11 and their shared traits point to remarkable convergent evolution if they do not share a most  
60 recent common ancestor.

61

## 62 INTRODUCTION

63

64 SAR11 are aerobic chemoorganoheterotrophs that comprise the largest fraction of  
65 bacterioplankton in the global ocean (1). Hallmarks of the group include streamlined genomes with  
66 high coding densities and few pseudogenes or gene duplications (2–4); unique requirements for  
67 amino acids, osmolytes, and C1 compounds (1); and a paucity of canonical regulatory suites (4).  
68 Five major SAR11 subclades have been classified and defined through ecogenomic observations  
69 during the preceding decades using 16S rRNA gene phylogenetic and whole genome  
70 phylogenomic approaches (1, 5–7). SAR11 is currently classified as a taxonomic order  
71 (*Pelagibacterales*), and the subclades represent genus to family level distinctions. The majority of  
72 SAR11 subclades are found in the epipelagic region, with the predominant subclade being Ia (7),  
73 however, subclades Ic and IIb can be found within the mesopelagic and bathypelagic (7–10).  
74 Surface water genomes have an average size of 1.33 Mbp, contrasting with that of deeper water  
75 genomes that average 1.49 Mbp (4, 10). The earliest diverging subclade V comprises two groups  
76 – Va shares a surface summer distribution with Ia in the Sargasso Sea, whereas Vb has both a  
77 surface and sub-euphotic distribution (7).

78

79 Although a stable member of SAR11 in rRNA gene phylogenies (7, 11), the inclusion of subclade  
80 V within SAR11 has recently been questioned by advanced phylogenomic approaches using new  
81 data (12, 13). Initially, some of these results were questionable due to the availability of only a  
82 single genome (HIMB59 - (3)) representing subclade V. However, reconstruction of subclade V  
83 MAGs provided additional genomic signal and the use of methods to correct for compositional  
84 biases placed HIMB59-type organisms on a separate branch of the Alphaproteobacteria (13, 14).  
85 Nevertheless, analyses of the HIMB59 genome indicated numerous similarities with SAR11,  
86 including the small size, low GC content, and conservation of similar metabolic pathways (3).  
87 Based on the genomic and ecological similarities with SAR11, deeper investigation of HIMB59-  
88 type organisms is warranted to understand their convergence with SAR11.

89

90 Early studies with 16S rRNA gene cloning have also defined a sister group to SAR11 that was  
91 given the name AEGEAN-169 (15). The group has a cosmopolitan distribution, identified in many  
92 regions including the Xiamen Sea, the San Pedro Ocean Time Series (SPOT), the South Pacific  
93 Gyre, and the Adriatic Sea (16–20). AEGEAN-169 was especially abundant in surface waters of  
94 the South Pacific Gyre and the Sargasso Sea, where numerous single-cell genomes were recently  
95 obtained, supporting the hypothesis of an ultraoligotrophic lifestyle (18, 19, 21). However, these  
96 organisms also respond to phytoplankton blooms (16), and AEGEAN-169 has also been observed  
97 at depths of 500 m or below at SPOT (17) and at 400 m in the NE Atlantic (22), as well as in  
98 coastal (23, 24) and reef (25) habitats. Seasonal blooms of AEGEAN-169 have been identified in  
99 the Mediterranean and Xiamen Seas through CARD-FISH and sequencing methodologies where  
100 their abundance was related to elevated CO<sub>2</sub> concentrations and temperature increases (19, 26). As  
101 a result, AEGEAN-169 may play a key role in expanding and warming oligotrophic conditions,

102 globally. AEGEAN-169 have also been implicated in phosphonate consumption (27), implicating  
103 another adaptation for the oligotrophic lifestyle.

104

105 While our knowledge of this group has improved, the AEGEAN-169 clade has not been examined  
106 thoroughly with comparative genomics, nor has its relationship to the SAR11 clade been formally  
107 established using modern phylogenomic techniques. AEGEAN-169 have sometimes been  
108 classified as belonging to the *Rhodospirillales* (16, 24, 26) and, more recently, were used as an  
109 outgroup to SAR11 within the Alphaproteobacteria (21, 27). Here, we present evidence from 16S  
110 rRNA gene phylogenetics and phylogenomics that AEGEAN-169 is a heterotopic synonym with  
111 SAR11 subclade V, also known as the HIMB59-type clade after the first isolate from the group  
112 (3). We do not attempt to reclassify the phylogeny of these organisms, as the close relationship  
113 between subclade V/HIMB59 and SAR11 has been examined in detail with advanced  
114 phylogenetic methods and appears to result from compositional artifacts (13, 14). Rather, we  
115 performed an extensive comparative genomics analysis using publicly available MAGs and SAGs  
116 from multiple databases (21, 28–30). We also include a closed genome from the second reported  
117 culture of this group, strain LSUCC0245, previously classified as a close relative to HIMB59 (31),  
118 and we provide the first physiological data for the clade resulting from this isolate. We aimed to  
119 define the taxonomy, distribution, and metabolic potential of AEGEAN-169/SAR11 subclade  
120 V/HIMB59 to better characterize its relationship to SAR11 *sensu stricto*.

121

## 122 MATERIALS AND METHODS

123

### 124 *Genome sequencing and assembly of LSUCC0245*

125 We previously isolated a close relative of HIMB59, strain LSUCC0245 (32). Due to the low  
126 densities of LSUCC0245 (mid-10<sup>5</sup> cells ml<sup>-1</sup>), and an inability of this organism to grow in large  
127 volumes, sixty 50 ml cultures (Supplemental Information -  
128 <https://doi.org/10.6084/m9.figshare.22027763>) grown in JW2 (32) were aggregated to achieve  
129 sufficient volumes for DNA sequencing. Samples were harvested via 0.2 µm filtration  
130 (polycarbonate, Millipore) in late log phase. DNA was extracted using the Mobio PowerWater kit  
131 (Qiagen) with a 50 ml elution in water, and library preparation and sequencing were performed as  
132 described (33). Illumina HiSeq sequencing generated 1,925,078 paired-end, 150 bp reads. Genome  
133 assembly was performed as described (33). Briefly, reads were trimmed with Trimmomatic v0.38  
134 (34), assembled with SPAdes v3.10.1 (35), and quality checked using Pilon v1.22 (36) after  
135 mapping reads to the assembly using BWA 0.7.17 (37). The assembly resulted in a single, circular  
136 contig, which was manually rotated approximately halfway between the original overlapping ends.  
137 Pilon was run on both the original contig and the rotated contig and detected no issues. Final  
138 coverage was 242x. The genome was annotated at IMG (<https://img.jgi.doe.gov/>) (38).

139

### 140 *Taxon selection*

141 We used SAR11 genomes collected previously from GTDB (30, 33) and AEGEAN-169 genomes  
142 from the IMG database, the GORG-TROPICS SAGs database, the Microbiomics database, and

143 the OceanDNA MAG catalog (21, 28, 29, 39). We initially used the HIMB59 and LSUCC0245  
144 genomes, as well as AEGEAN-169 SAGs from GORG-TROPICS and our SAR11 genome  
145 collection as a starting dataset, and used FastANI v1.33 (40) with default settings to identify  
146 additional SAR11 and AEGEAN-169 genomes from the Microbiomics and the OceanDNA MAG  
147 datasets. We dereplicated our initial dataset of 814 genomes with dREP v3.4.0 (41) using  
148 “dereplicate” with default settings to produce a final dataset of 438 representatives including  
149 AEGEAN-169 and the SAR11 clade (Supplemental Information -  
150 <https://doi.org/10.6084/m9.figshare.22027763>).

151  
152 *16S rRNA gene phylogeny*  
153 We used barrnap v0.9 (42) to parse all available 16S rRNA genes from the 438 genomes and  
154 combined them with relevant AEGEAN-169 16S rRNA gene clones (15), four rRNA gene clones  
155 that had been previously classified as SAR11 subclades Va and Vb (7), and other  
156 Alphaproteobacteria (<https://doi.org/10.6084/m9.figshare.22027763>). We aligned extracted gene  
157 sequences with Muscle v3.8.1551 (43) using default settings and constructed the tree using IQ-  
158 Tree2 v3.8.1551 (44) using “-b” for traditional bootstrapping (n=100), and which selected the  
159 GTR+F+I+G4 model. The tree was visualized and formatted using iTOL v5 (45).

160  
161 *16S rRNA gene identity*  
162 To calculate 16S rRNA gene identity, we constructed a BLAST (46) database of the 16S rRNA  
163 gene sequences from SAR11 and AEGEAN-169 using makeblastdb v2.9.0 with database “-type  
164 nucl”. We then ran blastn v2.9.0 with “-perc\_identity 40” and an e-value threshold of 1e-15 using  
165 the same 16S rRNA gene sequences to generate all pairwise 16S rRNA gene identities.

166  
167 *Genome metrics*  
168 We calculated genome metrics for all genomes in the final dataset with CheckM v1.1.3 lineage\_wf  
169 (47). We ran “checkm tree\_qa” followed by “checkm lineage\_set”. Continuing we ran “checkm  
170 analyze” followed by “checkm qa”. Relevant data including genome size, GC content, coding  
171 density, genome contamination, and genome completeness resulted from the check output.  
172 Estimated genome size was calculated using CheckM metrics as follows:

173  
174 
$$S = \frac{\alpha(1 - \beta)}{\gamma}$$

175  
176 where  $\alpha$  is the number of actual genome base pairs,  $\beta$  is predicted contamination, and  $\gamma$  is  
177 estimated completeness, as described previously (48).

178  
179 *Pangenome construction and metabolic profiling*  
180 Pangenomic analyses were completed with Anvi'o v7.1 (49). First, we generated Anvi'o contigs  
181 databases using “anvi-gen-contigs-database”. We then ran a series of annotations, calling the



182 contigs database. For Pfam (50) annotations, we ran “*anvi-run-pfams*”. For NCBI clusters of  
183 orthologous groups (COGs) (51) we ran “*anvi-run-ncbi-cogs*”. To import KEGG (52) annotations,  
184 we exported all amino acid sequences from respective contigs databases applying “*anvi-get-*  
185 *sequences-for-gene-calls*”. Amino acid sequences were input into the Ghostkoala (53) web  
186 application at KEGG (<https://www.kegg.jp/ghostkoala/>). Ghostkoala output was parsed to match  
187 respective contigs databases and prepped using “*KEGG-to-anvio*”. To import KEGG functions,  
188 we employed “*anvi-import-functions*”. To generate a genomes database from the annotated  
189 contigs databases we used “*anvi-get-genomes-storage*”. Having generated a viable genomes  
190 database, we then employed “*anvi-pan-genome*” with a minbit setting of 0.5 and mcl-inflation set  
191 at 2 to construct a pangenome database. To identify enriched functions by subclade we affixed  
192 subclade metadata to the pangenome database using “*anvi-import-misc-data*”. Following this, we  
193 ran “*anvi-get-enriched-functions-per-pan-group*” calling COG\_category, COG\_function,  
194 KeggGhostkoala, and Pfam, respectively (54). A pangenome summary was exported via “*anvi-*  
195 *summarize*” (55, 56). The pangenome summary is available in Supplemental Information  
196 (<https://doi.org/10.6084/m9.figshare.22027763>).

197

### 198 *Phylogenomics*

199 Genomes from AEGEAN-169 and SAR11 clade members were used for phylogenomics with  
200 conserved single-copy protein sequences as described previously (57). Briefly, single-copy  
201 orthologs were selected from the Anvi’o pangenomics output and all amino acid sequences were  
202 aligned and trimmed using Muscle v3.8.1551 and Trimal v1.4.1 with the “-automated1” flag, (43,  
203 58). The individual alignments were concatenated using the geneStitcher.py script from the  
204 Utensils package (<https://github.com/ballesterus/Utensils>) (59) and the phylogeny was inferred  
205 from the unpartitioned, concatenated alignment (<https://doi.org/10.6084/m9.figshare.22027763>)  
206 using IQ-Tree2 v2.0.6 (44), that selected the best-fitting site rate substitution model (LG+F+R10),  
207 and “-bb” for ultrafast bootstrapping. The tree was visualized and formatted using iTOL v5 (45).

208

### 209 *Proteorhodopsin phylogenetics*

210 To more accurately classify proteorhodopsin diversity across the different predicted variants,  
211 orthologous clusters from the Anvi’o pangenomics workflow that were annotated as rhodopsin  
212 proteins were aligned with reference sequences provided by Oded Beja (personal communication)  
213 using Muscle v3.8.1551, culled with Trimal v1.4.1 with the “-automated1” flag, and the phylogeny  
214 was inferred using IQ-Tree2 v2.0.6 (44), that selected the best-fitting site rate substitution model  
215 (VT+F+G4), and “-bb” for ultrafast bootstrapping. The tree was visualized and formatted using  
216 iTOL v5 (45). Proteorhodopsin tuning was assigned as previously described (60). The starting  
217 fasta file is available in Supplemental Information  
218 (<https://doi.org/10.6084/m9.figshare.22027763>).

219

### 220 *Metagenomic recruitment*

221 Metagenomic samples were compiled from the following datasets: TARA Oceans,  
222 BIOGOTRACES, MALASPINA, the Bermuda Atlantic Time Series (BATS), the Chesapeake,  
223 Delaware, and San Francisco Bays, the Hawaiian Ocean Time series (HOT), the Columbia River  
224 and Yaquina Bay, the Baltic Sea, Pearl River, Sapelo Island, Southern California Bight, and the  
225 northern Gulf of Mexico (61–69). We recruited reads from all datasets to the AEGEAN-169  
226 genomes *via* RRAP (70–72). Post-recruitment, we assessed subclade distribution by summing all  
227 Reads Per Kilobases of genome per Million bases of metagenome sequence (RPKM) values for  
228 the genomes within each subclade and plotting them by depth, temperature, and salinity.

229

### 230 *HOT analysis*

231 To assess seasonal distributions of AEGEAN-169, we used data from the Hawaiian Ocean Time  
232 series (HOT) that contained monthly samples for several different years. We sorted our global  
233 recruitment data to parse HOT-specific samples from Station ALOHA for the years 2004–2016.  
234 We then summed RPKM values respective to each subclade. We used Ocean Data Visualization  
235 (ODV) to sort summed RPKM data by subclade, month, and depth to interpret seasonality over a  
236 12-month timeline (73).

237

### 238 *Growth experiments*

239 LSUCC0245 was experimentally tested for growth ranges and optima as described previously (32).  
240 Briefly, we created artificial seawater media of different salinities through proportional dilution of  
241 the major salts. For the temperature-specific experiments, we used the isolation medium, JW2.  
242 Growth was measured with flow cytometry as described (32, 74).

243

### 244 *Data visualization*

245 All custom scripts and underlying data for generating the metagenomic recruitment, 16S identity,  
246 and comparative metabolism figures are available in Supplemental Information  
247 (<https://doi.org/10.6084/m9.figshare.22027763>).

248

249

## 250 **RESULTS**

251

### 252 *Genome reconstruction of LSUCC0245*

253 Strain LSUCC0245 was isolated as previously reported from surface water near the Calcasieu Ship  
254 Channel jetties in Cameron, Louisiana and found to be most similar to HIMB59 based on 16S  
255 rRNA gene sequence similarity (31). The two organisms share 99.77% 16S rRNA gene identity.  
256 We recovered a complete, circularized genome for strain LSUCC0245 that was 1,493,989 bp with  
257 a 32.54% GC content and 1,585 predicted coding genes.

258

### 259 *Phylogenetics and taxonomy*

260 We constructed a 16S rRNA gene tree using all recovered genes from the MAGs, SAGs, and  
261 isolates, as well as clones from the original AEGEAN-169 sequence report (15), using SAR11 and  
262 other Alphaproteobacteria as outgroups. We also included the subclade Va and Vb sequences  
263 previously used to delineate subclade V in SAR11 (7). We found that the Va and Vb sequences  
264 corresponded to two monophyletic groups containing all the 16S rRNA gene sequences from our  
265 genomes (including HIMB59 and LSUCC0245), as well as the AEGEAN-169 clone library  
266 sequences (**Fig. S1**). This topology demonstrates that the previously designated SAR11 subclade  
267 V is synonymous with AEGEAN-169, and we refer to the group by the latter name hereafter.  
268 AEGEAN-169 subclade I showed slightly deeper vertical branching in comparison to AEGEAN-  
269 169 subclade II.

270  
271 The average 16S rRNA gene identity between AEGEAN-169 and SAR11 was 84.3% (**Fig. S2**).  
272 This indicates a likely Family level difference, but is near the boundary specification for Order  
273 classification at 82% (75). AEGEAN-169 within subclade I and II gene identities averaged 97.9%  
274 and 95.7%, indicating that each subclade corresponds to a species rank. Thus, the formerly defined  
275 Va and Vb groupings correspond to two distinct species groups within AEGEAN-169, and the  
276 entire clade likely represents at least a distinct Family.

277  
278 To investigate the branching pattern between AEGEAN-169 subclades I and II, as well as within  
279 each subclade, we also constructed a phylogenomic tree of AEGEAN-169 and SAR11 using  
280 orthologous protein sequences extracted from the 438 genomes. The final translated alignment  
281 contained 28,837 amino acid positions. The monophyletic grouping of SAR11 and AEGEAN-169  
282 can arise from compositional artifacts (13, 14), and we made no attempt to correct for these  
283 artifacts here. Rather, we only used SAR11 as an outgroup based on rRNA gene relationships (7,  
284 11) (**Fig. S1**). Similarly to the 16S rRNA gene tree, we observed two distinct monophyletic  
285 subclades encompassing all AEGEAN-169 genomes wherein strain LSUCC0245 was sister to  
286 HIMB059 (**Fig. 1**). AEGEAN-169 subclade I was characterized by four distinct subgroups (Ia-Id)  
287 and subclade II was characterized by seven subgroups (IIa-IIg) defined through branching patterns.  
288 LSUCC0245 and HIMB59 were members of subgroup Ib.

### 289 *Genome Metrics*

291 Estimated and actual genome sizes for AEGEAN-169 ranged from 1.26 Mbp to 1.84 Mbp with a  
292 mean of 1.55 Mbp (**Fig. 2**). The AEGEAN-169 genomes were larger than SAR11 (t-test,  $p < 0.01$ ,  
293 R v4.2.1 (76)), which have genomes ranging 0.88 Mbp to 1.69 Mbp, with a mean of 1.22 Mbp).  
294 GC content for AEGEAN-169 ranged from 27.0% to 32.5% with a mean of 29.5%. These values  
295 were similar to SAR11 (t-test,  $p = 0.09$ ), whose GC content ranged from 27.6% to 35.9% with a  
296 mean of 29.3%. AEGEAN-169 coding densities ranged from 93.6% to 96.8% with a mean of  
297 96.2%. SAR11 coding densities ranged from 92.0% to 97.1% with a mean of 96.4%. Thus,  
298 AEGEAN-169 had similar levels of genome streamlining to SAR11 even though the genomes  
299 were slightly larger.



300

### 301 *Ecology*

302 AEGEAN-169 is predominantly a surface water organism within the euphotic zone, with subgroup  
303 IIg dominating metagenomic recruitment in most marine locations, followed by subgroup Id (**Fig.**  
304 **S3a**). Subgroup IIc appeared to be a deep water bathytype, recruiting reads almost exclusively  
305 below 125m, with highest recruitment below the euphotic zone. Subgroup IIe was also more  
306 abundant in deeper waters, although it could be found at the surface (**Fig. S3a**). These patterns  
307 were consistent with distributions by temperature, where the surface subclades dominated in  
308 warmer temperatures, and the deeper subclades recruited most reads in colder water (**Fig. S3b**).  
309 We classified salinity according to the Venice system (< 0.5 fresh, 0.5-4.9 oligohaline, 5-17.9  
310 mesohaline, 18-29.9 polyhaline, 30-39.9 euhaline, > 40 hyperhaline) (ITO 1959 (77)), confirming  
311 subgroup IIg as a marine organism with recruitment almost exclusively in euhaline and  
312 hyperhaline (**Fig. S3c**). Subgroup Ib was most prominent in polyhaline samples and recruited the  
313 most reads from mesohaline samples, so this likely represents a brackish water clade. None of the  
314 genomes within any subgroup represented freshwater taxa.

315

316 We also examined spatio-temporal trends from the Hawaii Ocean Time series (HOT) using  
317 samples collected monthly during the years 2003-2016 and normalizing by month. These samples  
318 extended to 500m. These data indicated that AEGEAN-169 has two primary ecological niches at  
319 HOT; surface water subgroups that bloom in the late summer/early fall and subgroups that occur  
320 primarily at 100-200 m and appear to have a fall bloom period (**Fig. 3**). Subgroups Ic, Id, and IIg  
321 were the primary surface water groups, with Id and IIg being the most abundant at HOT, consistent  
322 with our global recruitment data (**Fig. S3**). Subgroups Ila, IId, and IIe were the dominant ecotypes  
323 in the 100-200 m range, suggesting they are associated with the deep chlorophyll maxima.  
324 Subgroups IIc and IIe were the only clades detected at 500 m, consistent with these organisms  
325 being deep water bathytypes.

326

### 327 *Metabolic variation*

328 What is currently known about the metabolism of AEGEAN-169 comes primarily from the  
329 HIMB59 genome (3). We have extended these observations to a larger diversity of genomes  
330 spanning the two subclades of AEGEAN-169. In general, these organisms are predicted to be  
331 obligate aerobes with chemoorganoheterotrophic metabolism. They have genes for central carbon  
332 metabolism by way of glycolysis, the pentose phosphate pathway, and the citric acid cycle, similar  
333 to SAR11. However, AEGEAN-169 metabolic capacity differs in several important ways, notably  
334 through sugar metabolism and trace metal and vitamin transport. AEGEAN-169 genomes had a  
335 fructose ABC transporter, predominantly in subclade I, subclade II members had a predicted  
336 trehalose/maltose ABC transporter, and both subclades included representatives with a  
337 galactose/raffinose/stachyose/melibiose ABC transporter- systems that are not found in SAR11  
338 (**Fig. 4**). Although AEGEAN-169 genomes lacked an L-proline symporter found in SAR11, they  
339 shared the *potABCD* putrescine/spermidine transporter with SAR11, and had an additional

340 *potFGBI* putrescine transporter and *algEFG* alpha-glucoside transporter not found in SAR11 (**Fig.**  
341 **4**). Moreover, both AEGEAN-169 subclades had greater transport potential for trace metals and  
342 vitamins. Both subclades had heme and tungsten transporters not found in SAR11, and as well as  
343 the potential for thiamin transport that is absent in SAR11 (**Fig. 4**).  
344

345 AEGEAN-169 glycolytic inputs and central carbon metabolism also had key differences from  
346 those in SAR11. As reported previously for HIMB59 (3), AEGEAN-169 has the  
347 phosphofructokinase (pfk) for Embden–Meyerhof–Parnas glycolysis (**Fig. 4**). While this gene is  
348 found in some SAR11, including LD12 (78), it is missing from the dominant SAR11 subclade Ia  
349 organisms (**Fig. 4**). Consistent with the transporters for sugars, sugar metabolism was expanded.  
350 AEGEAN-169 members had predicted genes for the conversion of many sugars into galactose  
351 and/or fructose, as well as the *galKMT* pathway for galactose metabolism (**Fig. 4**). AEGEAN-169  
352 also differed from SAR11 through the absence of *ppdK*, which converts phosphoenolpyruvate to  
353 pyruvate for gluconeogenesis (**Fig. 4**). While some subclade II members had *aceB* (malate  
354 synthase), we only found two examples of *aceA* (isocitrate lyase) in AEGEAN-169, and thus they  
355 appear to mostly lack the traditional glyoxylate shunt that is a hallmark of SAR11 (3, 78).  
356 However, most members of AEGEAN-169 subclade II had a predicted *ghrA*  
357 (glyoxylate/hydroxypyruvate reductase) (**Fig. 4**), which can convert glycolate to glyoxylate. Only  
358 two LD12 genomes had this gene within SAR11. AEGEAN-169 organisms with both *ghrA* and  
359 *aceB* should have the ability to bring glycolate into the TCA cycle, allowing them to take  
360 advantage of that widely abundant phytoplankton-produced compound (79, 80).  
361

### 362 *Proteorhodopsin*

363 We identified multiple gene clusters annotated as potential rhodopsin homologs within the  
364 pangenome, and numerous AEGEAN-169 genomes, including LSUCC0245, contain multiple  
365 copies of predicted proteorhodopsins (**Fig. S4**). Phylogenetic evaluation of these gene copies  
366 indicated multiple clusters with differential spectral tuning and a separate group of possible  
367 rhodopsin homologs that currently do not have functional prediction. These observations  
368 corroborate a recent investigation of proteorhodopsin paralogs in SAR11 and HIMB59-clade  
369 organisms (81).  
370

### 371 *Physiology*

372 We measured the growth rates of LSUCC0245 across multiple salinities and temperatures. This  
373 strain was a marine-adapted mesophile, growing optimally at 24°C, and slowly at 30°C, but not at  
374 12 or 35°C (**Fig. 5a**). It grew optimally at a seawater salinity of 34 and in salinities as low as 11.6.  
375 Its maximum growth rate was  $0.02 \pm 0.007$  divisions  $\text{hr}^{-1}$  at 24°C (**Fig. 5b**). LSUCC0245 had very  
376 low growth yields in our media ( $< 10^6$  cells  $\text{ml}^{-1}$ ) (**Fig. S5**). Given the complex mixture of low  
377 concentration carbon sources in the medium, it appears likely that LSUCC0245 was only using a  
378 small subset of the available substrates. We also note that several of the sugar, sugar alcohol, and  
379 polyamine compounds that we predict as usable by LSUCC0245 (e.g., sorbitol, mannitol, fructose,

380 galactose, putrescine- **Fig. 4**) were not available in the JW2 medium (32). Thus, more in-depth  
381 exploration of usable carbon sources is warranted.

382

383

## 384 **DISCUSSION**

385 This study aimed to define AEGEAN-169 through the lens of taxonomy, ecology, and metabolism,  
386 with the goal of understanding how similar or distinct these organisms are from SAR11. Our  
387 results provide the first detailed examination of AEGEAN-169 genomics and genome-based  
388 ecology. The overall picture is one of a group that shares a very similar ecological regime as  
389 SAR11 – the majority of AEGEAN-169 members are most abundant in surface marine waters with  
390 seasonality that overlaps with SAR11. AEGEAN-169 and SAR11 were similar in relation to  
391 central carbon metabolism with a few key differences in capability. However, there were important  
392 metabolic differences between these groups, particularly the utilization of additional sugars, trace  
393 metals, and vitamins by AEGEAN-169, that may help distinguish their niche in terms of  
394 interactions with dissolved organic matter.

395

396 Although previous phylogenetic studies have considered SAR11 and AEGEAN-169 sister clades  
397 (21, 27, 82) this relationship likely results from compositional artifacts in the underlying sequence  
398 data (12, 13, 15). We reemphasize that our goal with phylogenetics and phylogenomics in this  
399 study was only to establish the subclade relationships within AEGEAN-169. Our work  
400 demonstrates, using both 16S rRNA genes and whole genome data, that AEGEAN-169 is a  
401 heterotopic synonym with SAR11 subclade V/HIMB59 (**Fig. S1**), thus condensing these disparate  
402 taxonomic designations. We propose using AEGEAN-169 as the primary moniker as we have done  
403 herein until a formal taxonomic designation is established. The major AEGEAN-169 subclade I  
404 and II delineation corresponds to the Va and Vb designations made on the basis of previous 16S  
405 rRNA gene phylogeny, respectively (7). While early work suggested a closer taxonomic  
406 relationship between HIMB59 and SAR11 through the use of synteny and genome organization  
407 (3), these observations were based on a singular genomic representative from AEGEAN-169  
408 subclade I (HIMB59) and did not define the depth of the genus, as is now possible with current  
409 datasets (21, 28, 29). Thus, future examination of the phylogenetic relationships between  
410 AEGEAN-169, SAR11, and other Alphaproteobacteria should benefit from the expanded taxon  
411 selection provided by these studies.

412

413 Members of AEGEAN-169 were primarily surface-water marine organisms, sharing similar  
414 ecological distributions with SAR11 (7, 83–85). AEGEAN-169 was most abundant at depths  
415 between 5.1-75m. These observations corroborate previous characterizations of AEGEAN-169 as  
416 a predominantly surface water group that is likely stimulated by blooms occurring in late summer  
417 and fall (16, 18, 19, 86). AEGEAN-169 subgroups IIc and IIe were found predominantly in deeper  
418 waters (**Fig. S3a**) supporting bathytype designations, similarly to SAR11 subclade Ic (10).  
419 Notably, subclade II was the primary group with recruitment observed at 200 m or below, which

420 is consistent with its distribution based on 16S rRNA gene data at BATS where subclade I (Va)  
421 was a surface water group, whereas subclade II (Vb) was found in both surface and 200 m waters  
422 (7). With respect to salinity, AEGEAN-169 were almost all marine-adapted, although subgroup Ib  
423 was most abundant in polyhaline conditions, suggesting that members of this subgroup inhabit a  
424 brackish niche (**Fig. S3c**) (12). The specific subgroup salinity preference resembles that described  
425 for SAR11 subclade IIIa (33). Overall, the high amount of overlap between the habitats of SAR11  
426 and AEGEAN-169 likely explains the metabolic variation we observed between the two groups.

427  
428 AEGEAN-169 lacked *ppdK* which converts phosphoenolpyruvate to pyruvate as well as the  
429 converse reaction (**Fig. 4**). This suggests that gluconeogenic activity is limited, which differs from  
430 the predicted complete gluconeogenesis pathway in SAR11 (3). Novel sugar intake was exhibited  
431 in AEGEAN-169 by means of multi-alpha-glucoside, fructose, rhamnose, trehalose/maltose, and  
432 raffinose/stachyose/melibiose ABC transporters (**Fig. 4**). Expanded sugar metabolism was a  
433 feature first reported for HIMB59 based on the single genome at the time (3) and we demonstrate  
434 that this trait is conserved across AEGEAN-169 genomes. Many of the aforementioned sugars  
435 were predicted to be metabolized to galactose and through the *galKMT* genes (missing in SAR11)  
436 to alpha-D-glucose-1P (**Fig. 4**). However, AEGEAN-169 was missing the phosphoglucomutase  
437 found in SAR11, and we found no other means to convert alpha-D-glucose-1P to alpha-D-glucose-  
438 6P. Thus, how these sugars enter glycolysis is currently unclear. Nevertheless, given the greater  
439 emphasis on sugar transport and metabolism, but the lack of *ppdK*, perhaps AEGEAN-169  
440 organisms rely on external sources of sugar instead of gluconeogenesis.

441  
442 Another difference was that most AEGEAN-169 members had a predicted putrescine ABC  
443 transporter (*potFGHI*) not found in SAR11 (**Fig. 4**). SAR11 and some AEGEAN-169 members  
444 have homologs of the *potABCD* spermidine/putrescine ABC transporter (Supplemental  
445 Information - <https://doi.org/10.6084/m9.figshare.22027763>), and SAR11 responds  
446 disproportionately to addition of both of these polyamines in natural communities (87, 88). The  
447 *potABCD* genes transport five different polyamines in SAR11, where these compounds can meet  
448 cellular nitrogen requirements (89), and is spermidine-preferential in *Escherichia coli* (90). The  
449 additional *potFGHI* genes in AEGEAN-169 suggest increased use of putrescine compared to  
450 SAR11, as this transporter is considered putrescine-specific (90). Thus, SAR11 and AEGEAN-  
451 169 may have differential polyamine preferences in nature.

452  
453 Trace metal and vitamin transport also distinguished AEGEAN-169 from SAR11. AEGEAN-169  
454 uniquely had genes for an iron/zinc chelator, as well as heme and tungsten transport (**Fig. 4**).  
455 SAR11 members have quite limited trace metal transport capabilities (91). The potential of  
456 AEGEAN-169 to transport heme would provide them with an alternative source of iron, and the  
457 presence of the transporter corroborates recent findings that many abundant marine  
458 microorganisms are heme auxotrophs (92), including AEGEAN-169 members (designated  
459 HIMB59 by the authors). Most surprising was the presence of a tungsten transporter which

460 traditionally has been observed in thermophilic archaea as well as *Sulfitobacteria dubius* and some  
461 *Clostridium* spp. and *Eubacterium* spp., although hyperthermophilic archaea appear to be the only  
462 group that requires tungsten (93–95). This suggests that AEGEAN-169 may utilize  
463 tungstoenzymes, such as a tungsten-containing version of formate dehydrogenase (96). Formate  
464 dehydrogenases are conserved throughout SAR11 and AEGEAN-169 (Supplemental Information -  
465 <https://doi.org/10.6084/m9.figshare.22027763>), but the clades may use different cofactors.  
466 AEGEAN-169 also had the capacity to transport thiamin (vitamin B1), which may provide another  
467 means of niche differentiation since SAR11 relies on thiamin precursors instead of directly  
468 uptaking thiamin (97).

469  
470 The increased potential of sugar, trace metal, and vitamin transport and metabolism are important  
471 traits differentiating AEGEAN-169 from SAR11, and likely mean that AEGEAN-169 has a more  
472 extensive metabolic niche than SAR11. This expanded metabolic repertoire correlates with the  
473 slightly larger genome sizes in AEGEAN-169 compared to SAR11, even though both strains have  
474 the hallmark coding density associated with genome streamlining. Nevertheless, SAR11 is the  
475 more successful group, with relative abundances that are usually much higher than that of  
476 AEGEAN-169 (e.g., (7)). In this context, it is notable that strain LSUCC0245 grew to much lower  
477 cell densities than SAR11 strains in the same medium, even though growth rates were similar (33,  
478 78). Since our defined media have numerous carbon compounds at similar concentrations, these  
479 yield differences either mean that SAR11 and AEGEAN-169 use a different set of compounds  
480 available in the medium, or there is something inherently different about growth physiology with  
481 AEGEAN-169. Future studies should incorporate cultivation assessments to investigate the  
482 metabolic differences we have identified, as well as the differences in physiology. Additional  
483 isolates will also help improve our overall understanding of the diversity of functions in the group  
484 and shed more light on the evolutionary pressures that have led to the similarities that AEGEAN-  
485 169 and SAR11 share.

486

#### 487 **Data Availability**

488 Raw reads for the LSUCC0245 genome were deposited at NCBI BioProject number  
489 [PRJNA931292](https://bioproject.ncbi.nlm.nih.gov/submitter/study.cgi?study_id=PRJNA931292), and the genome is publicly available on IMG (<https://img.jgi.doe.gov/>) under  
490 Genome ID: 2756170191. Supporting datasets, scripts, and files are available at  
491 <https://doi.org/10.6084/m9.figshare.22027763>.

492

#### 493 **Conflict of Interests**

494 The authors declare that they have no conflict of interest.

495

#### 496 **Acknowledgements**

497 We thank Oded Beja for insightful comments and reference sequences for rhodopsins. The authors  
498 acknowledge the Center for Advanced Research Computing (CARC) at the University of Southern  
499 California for providing computing resources that have contributed to the research results reported



500 within this publication. URL: <https://carc.usc.edu>. Portions of this research were conducted with  
501 high performance computing resources provided by Louisiana State University  
502 (<http://www.hpc.lsu.edu>). This work was supported by a Simons Early Career Investigator in  
503 Marine Microbial Ecology and Evolution Award, and NSF Biological Oceanography Program  
504 OCE-1945279 and Emerging Frontiers Program EF-2125191 grants to J.C.T.  
505

506 **Figure 1. Phylogeny of AEGEAN-169 showing subclade designations.** Values on the branches indicate ultrafast  
507 bootstrap support (n=1000), and subclade branches are colored to help provide contrast. Tree scale indicates changes  
508 per position according to the scale bar. SAR11 genomes were used as the outgroup.

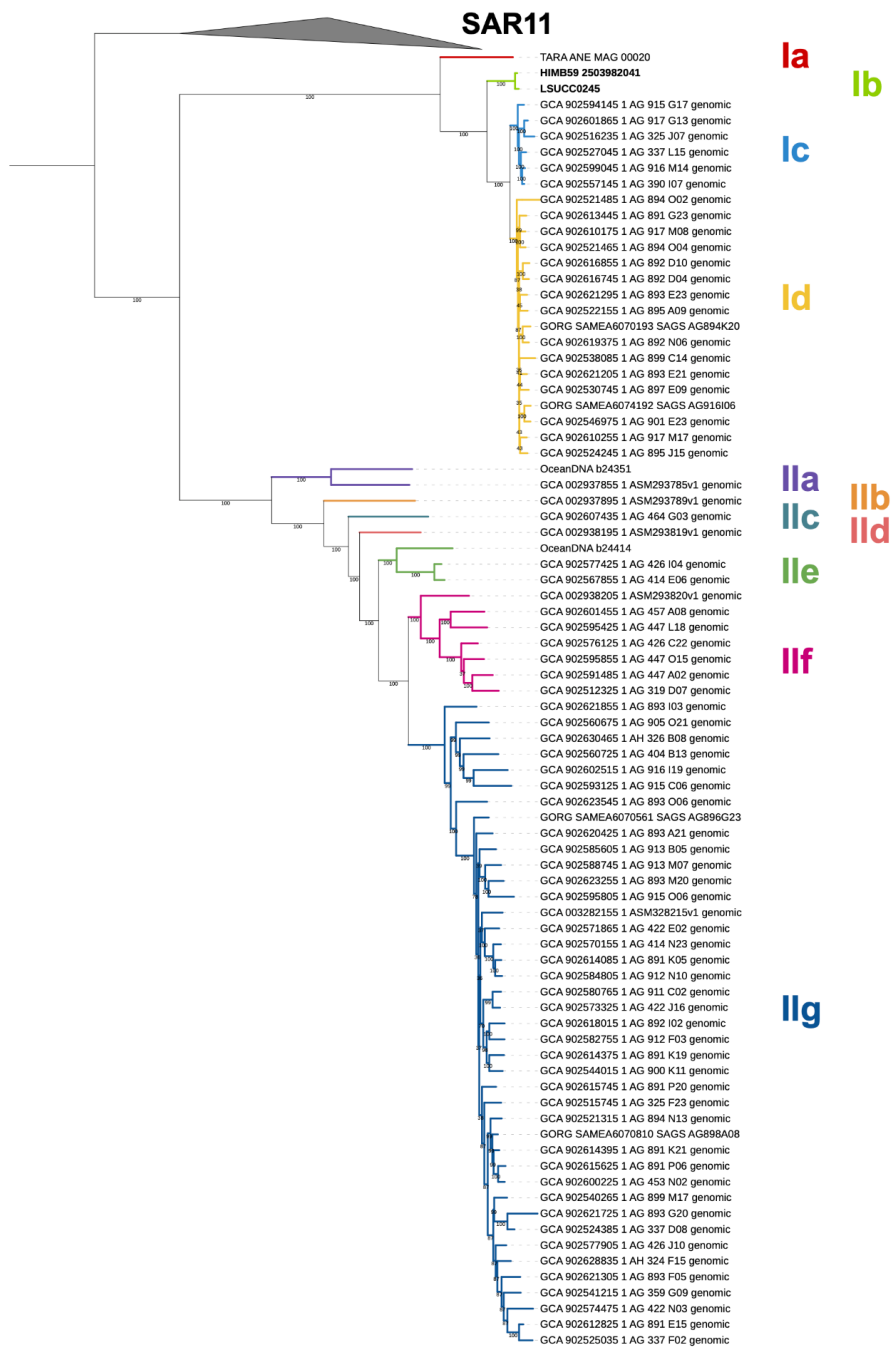

509

Tree scale: 1

510 **Figure 2. Boxplots illustrating the bulk genome characteristics of AEGEAN-169 subclades compared to SAR11.**  
511 Subclades are colored according to the tree in Figure 1. Boxes describe the interquartile range (IQR) with the median  
512 indicated as a bar. Whiskers indicate 1.5x IQR and outlier points are plotted beyond the whiskers. The underlying  
513 datapoints for each boxplot is also plotted on top.  
514

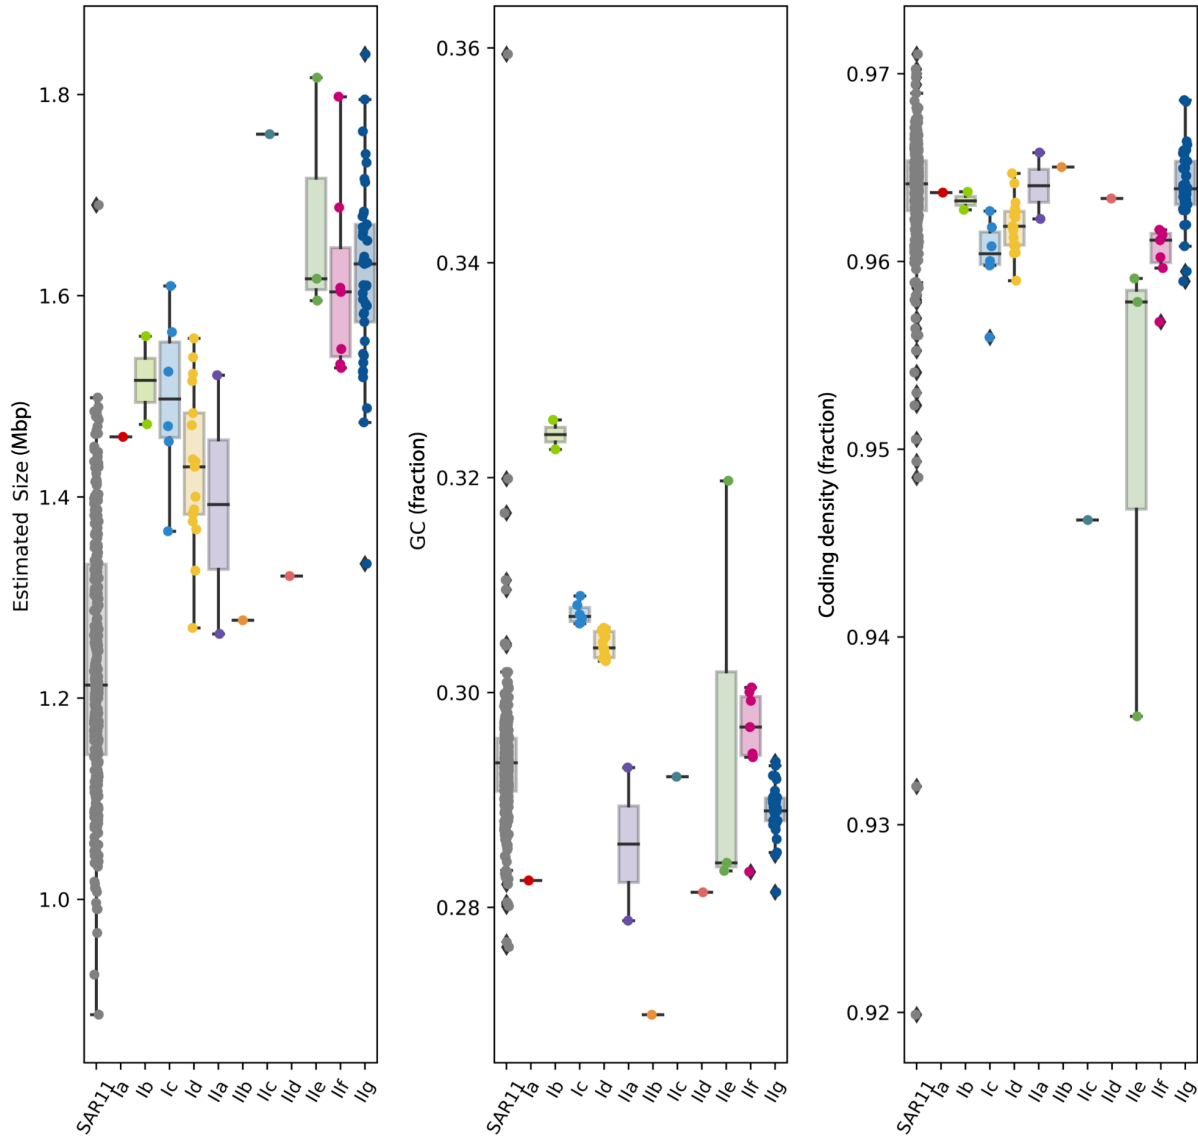

515

516 **Figure 3. AEGEAN-169 subclade distribution at Station ALOHA using HOT data spanning from 2003-2016.**  
517 Each subclade is plotted with a separate scale. Months correspond from 1 (January) to 12 (December). RPKM - Reads  
518 per kilobase (of genome) per megabase (of metagenome).

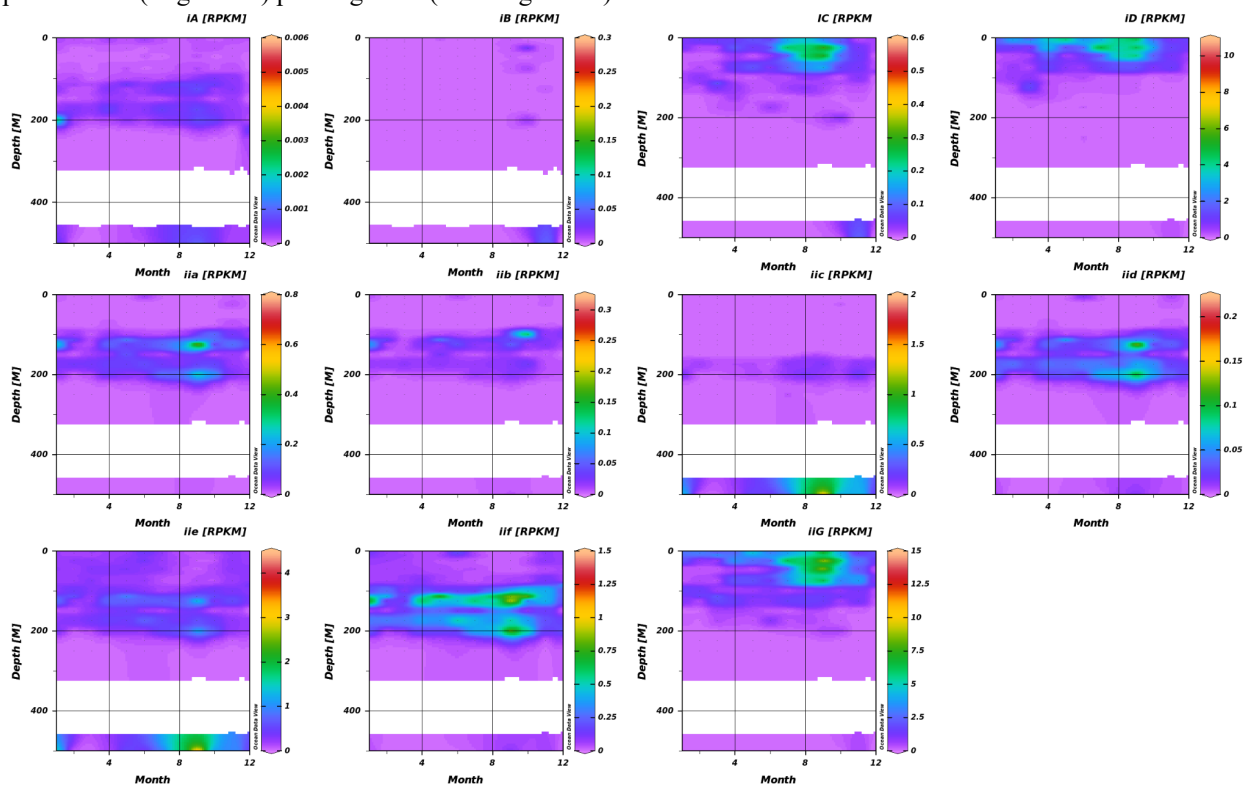

519

520 **Figure 4. Key metabolic variation between AEGEAN-169 and SAR11.** The phylogenomic tree on the left  
 521 corresponds to the colors in Figure 1, with SAR11 indicated in only black branches below AEGEAN-169. Gene names  
 522 correspond to components found for these systems.

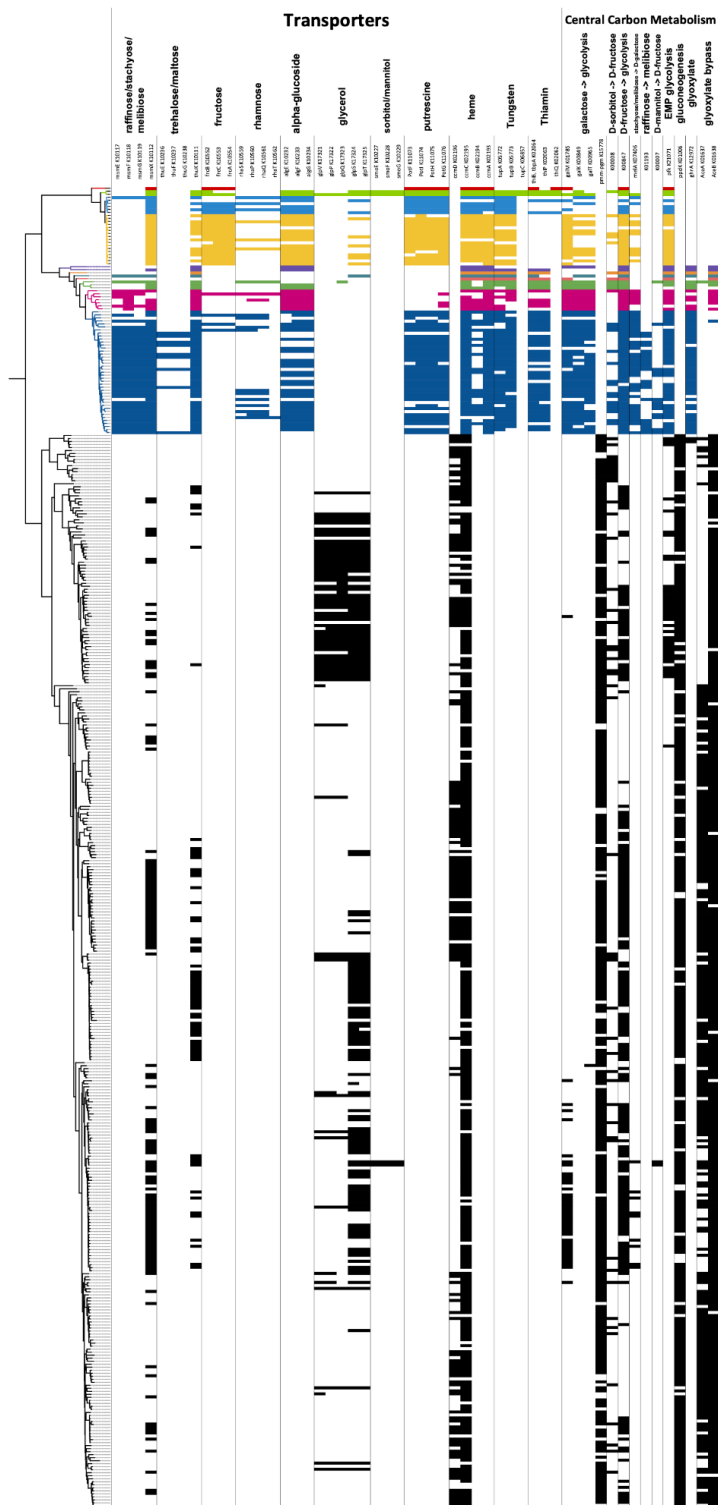

523



524 **Figure 5a. LSUCC0245 temperature dependent growth.** Calculated using sparse-growth-curve (98). Specific  
525 growth rate and doubling rate are indicated with the dual y-axes. A best-fit line connects the points to predict rates in  
526 between measured values and shading indicates 95% confidence intervals.

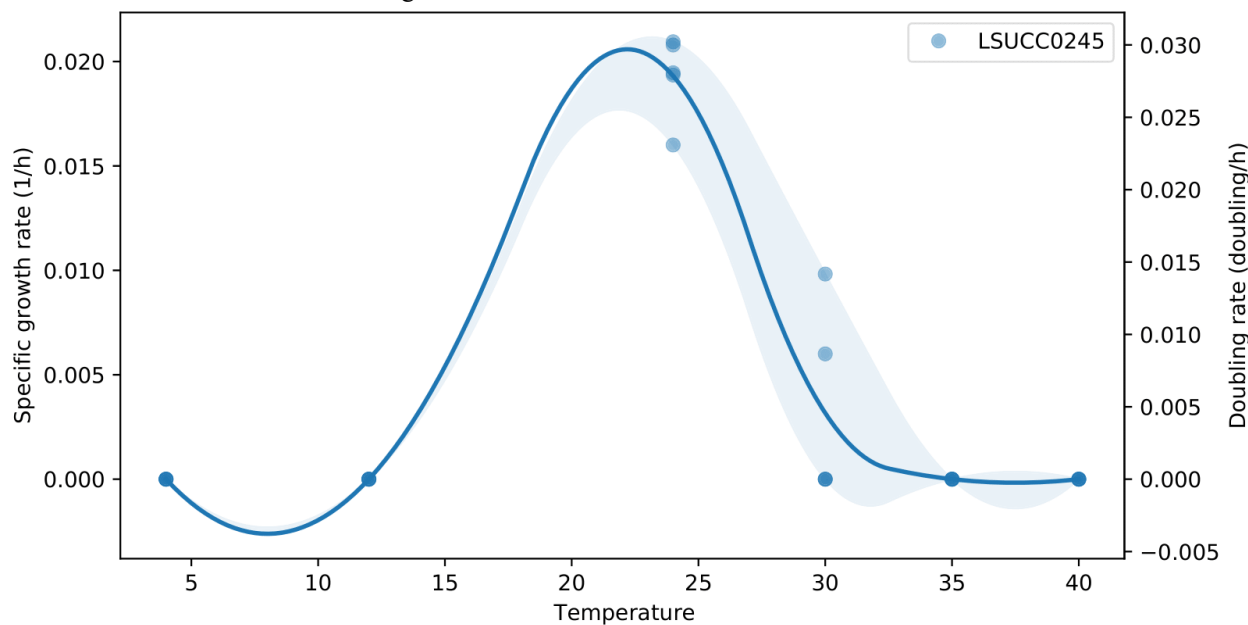

527  
528  
529  
530  
531  
532

**Figure 5b. LSUCC0245 salinity dependent growth.** Calculated using sparse-growth-curve (98). Specific growth  
rate and doubling rate are indicated with the dual y-axes. A best-fit line connects the points to predict rates in  
between measured values and shading indicates 95% confidence intervals.

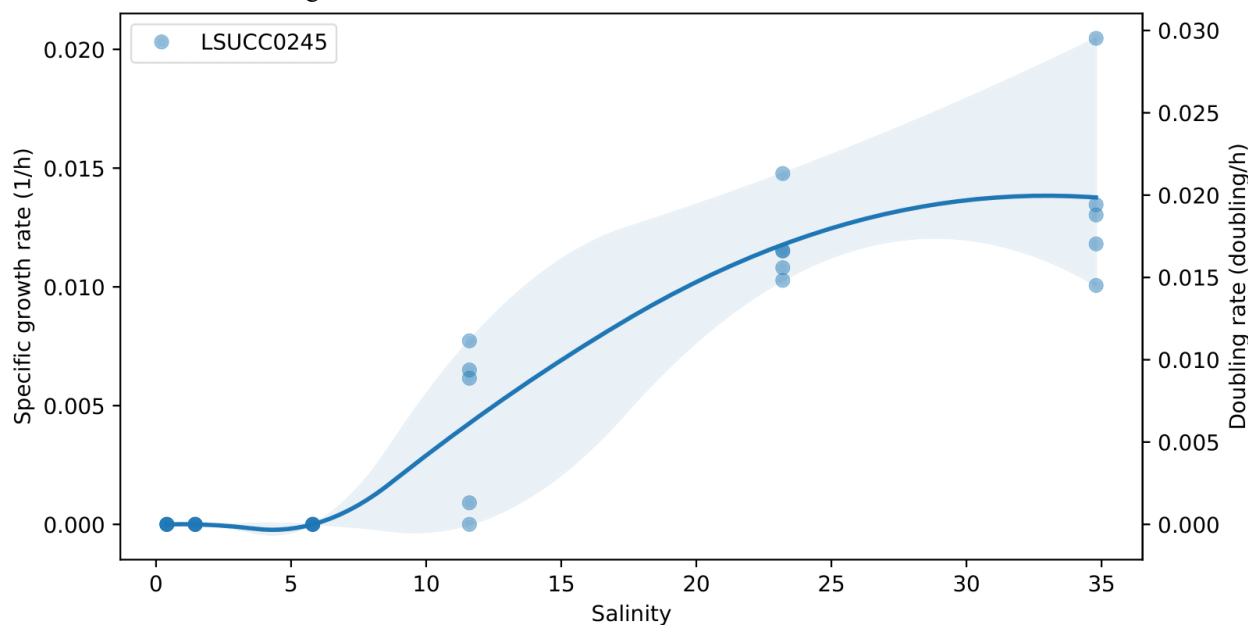

533  
534  
535  
536  
537

538  
 539 **Figure S1. 16S rRNA gene tree phylogeny of AEGEAN-169, SAR11, and other Alphaproteobacteria.** Genomes  
 540 and clone library markers of interest are bolded within the AEGEAN-169 subclades for emphasis. All sequences for  
 541 SAR11 are collapsed. The original AEGEAN-169 16S rRNA gene marker groups with the SAR11 subclade Va  
 542 markers and the two cultured isolates, HIMB59 and LSUCC0245 in subclade I. The SAR11 subclade Vb  
 543 group with AEGEAN-169 subclade II. Values at the nodes indicate traditional bootstraps (n=100) and the Tree scale  
 544 indicates changes per position according to the bar. The tree was rooted on *Rickettsia typhi*.

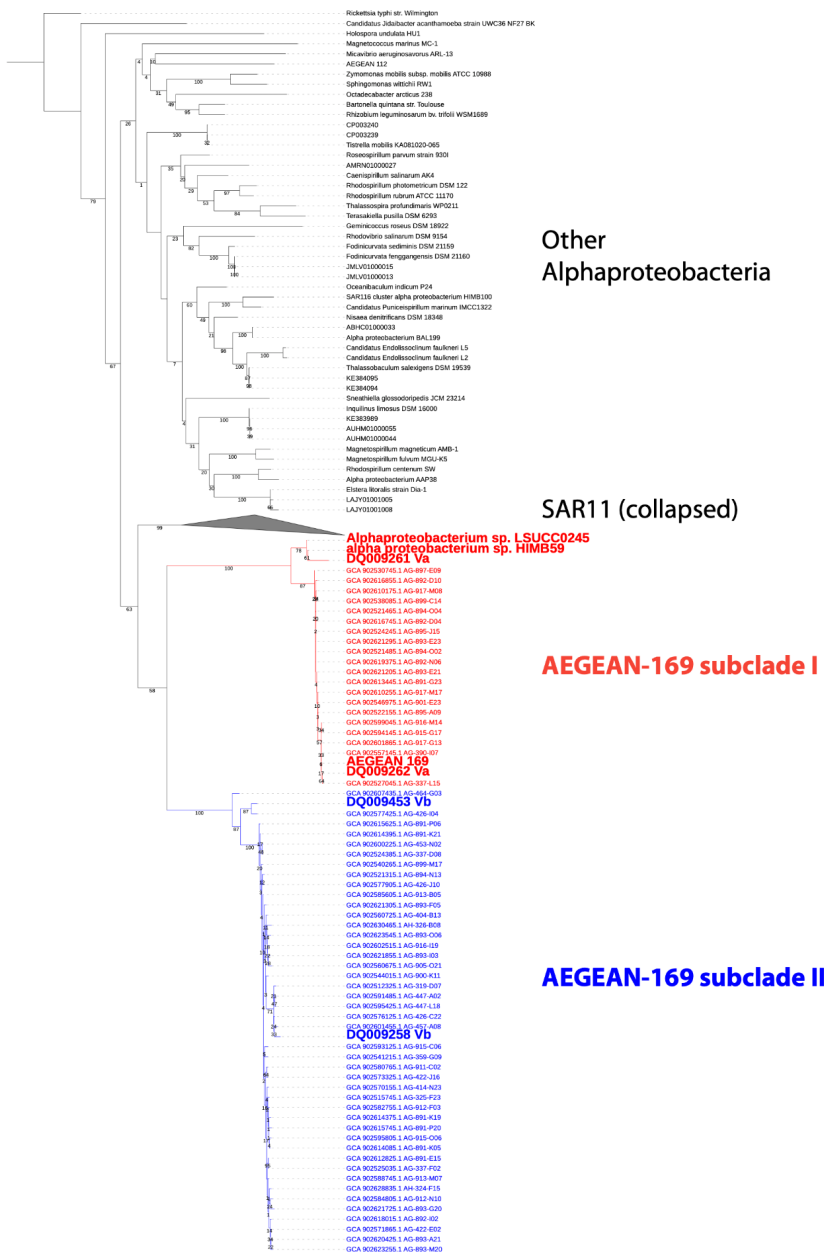

545  
 546  
 547  
 548

549 **Figure S2. 16S rRNA gene identity of AEGEAN-169 and SAR11.** Subclade colors of the dendrogram correspond  
550 to those in Fig. S1, excluding other Alphaproteobacteria. Percent identity is denoted according to the scale bar on the  
551 right.

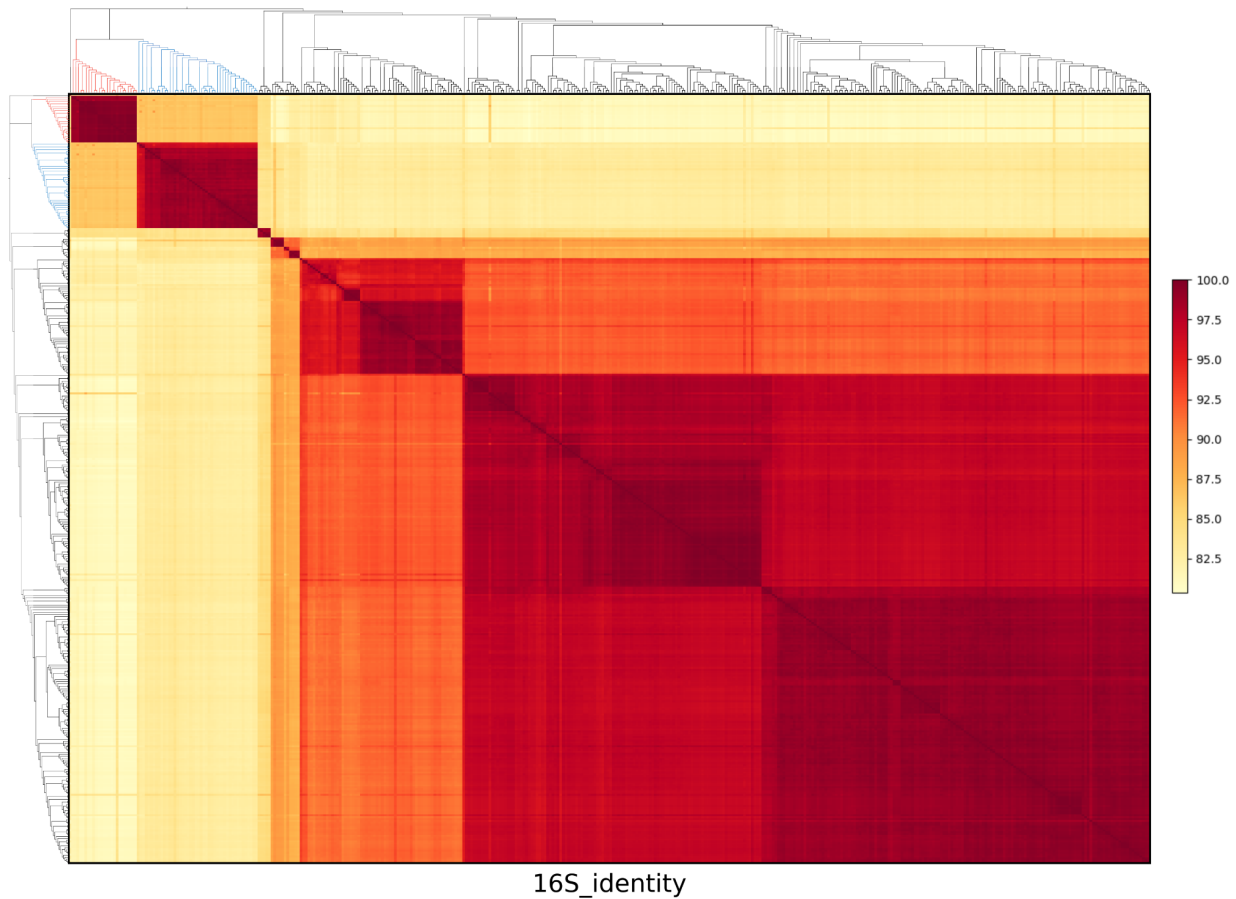

552  
553  
554  
555  
556  
557  
558  
559  
560  
561  
562  
563  
564  
565  
566  
567  
568  
569  
570  
571  
572  
573

574 **Figure S3a. AEGEAN-169 subclade distribution by depth.** Subclades are plotted according to the sum of the  
575 individual genome RPKMs comprising that subclade. RPKM - Reads per kilobase of genome sequence per megabase  
576 of metagenomic sequence.

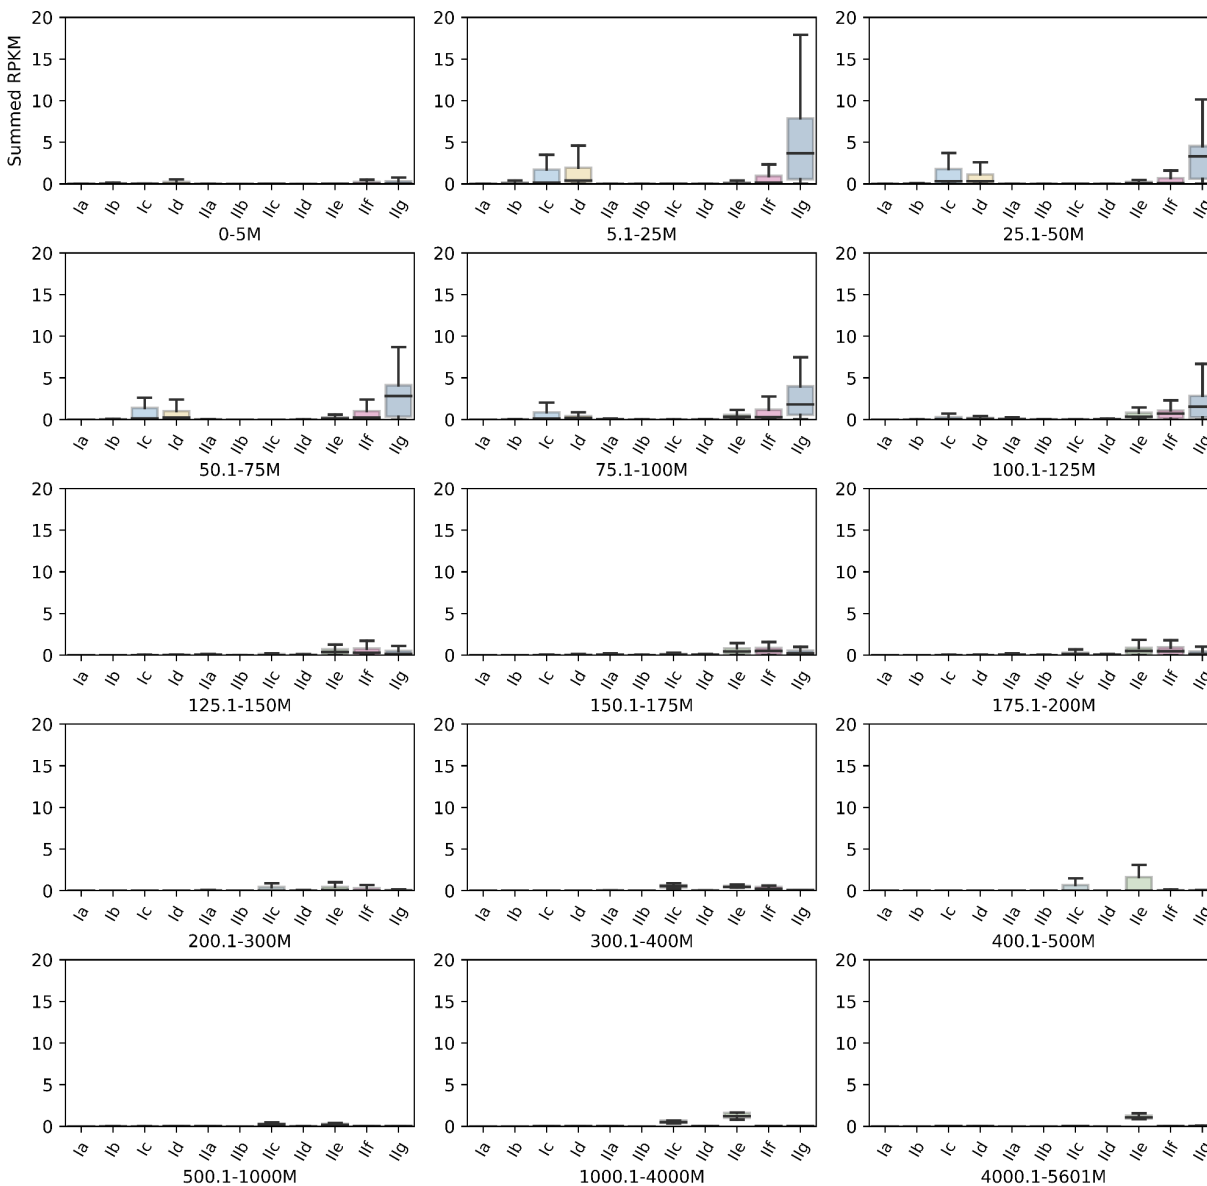

577  
578  
579  
580  
581  
582  
583  
584  
585  
586  
587  
588  
589  
590

591  
592  
593  
594  
595

**Figure S3b. AEGEAN-169 subclade distribution by temperature.** Subclades are plotted according to the sum of the individual genome RPKMs comprising that subclade. RPKM - Reads per kilobase of genome sequence per megabase of metagenomic sequence.

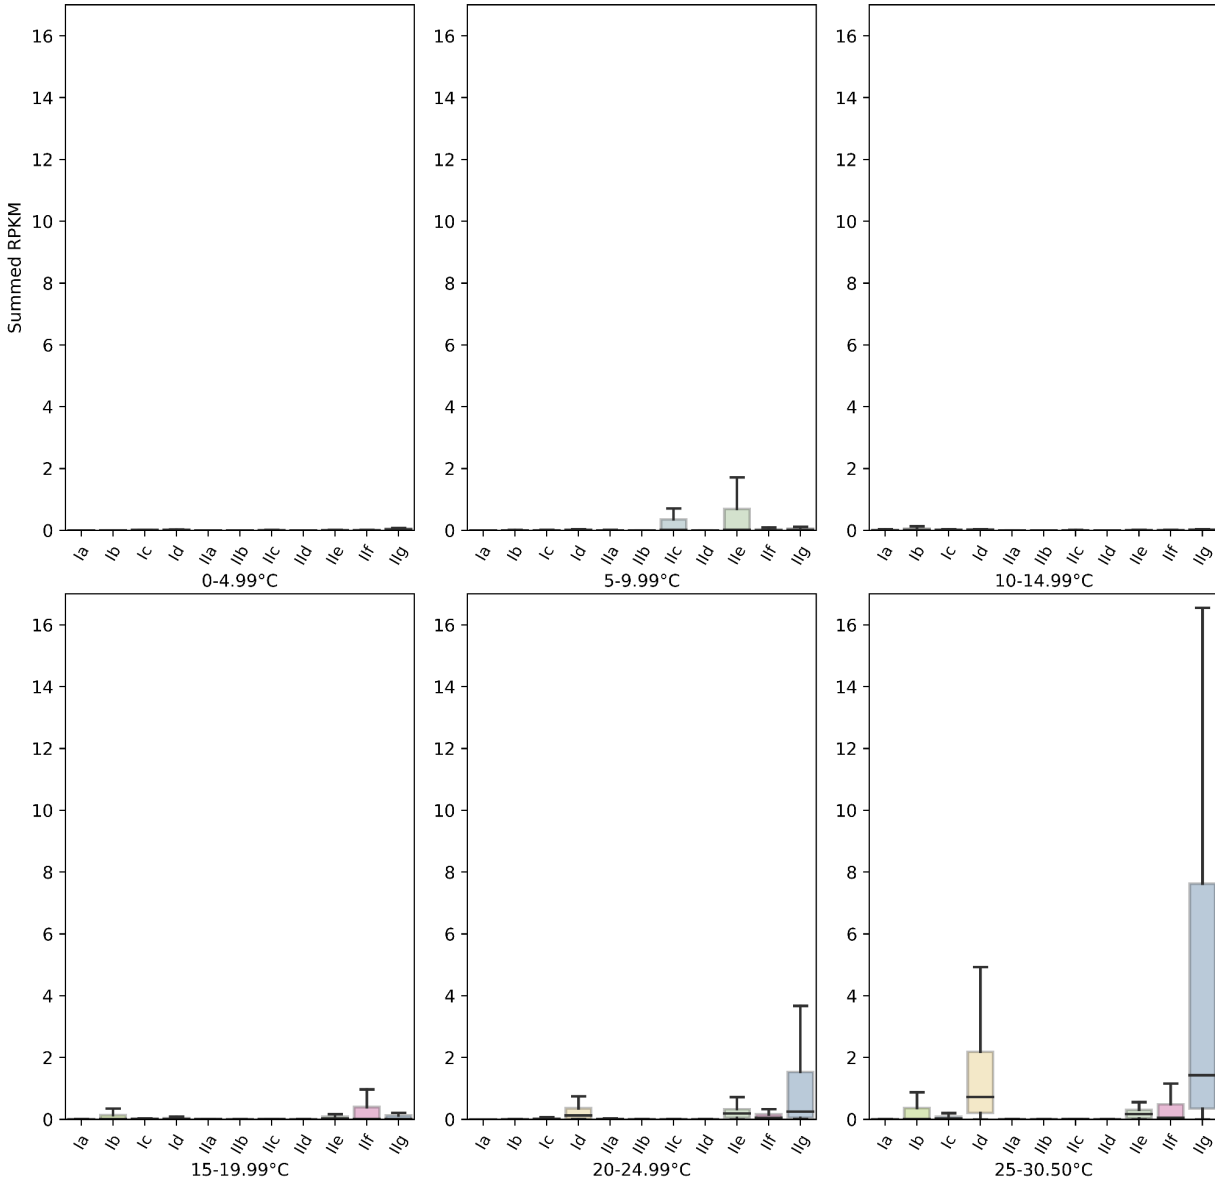

596  
597  
598  
599  
600  
601  
602  
603  
604  
605



606 **Figure S3c. AEGEAN-169 subclade distribution by salinity.** Subclades are plotted according to the sum of the  
607 individual genome RPKMs comprising that subclade. RPKM - Reads per kilobase of genome sequence per megabase  
608 of metagenomic sequence. Salinity categories are as follows: < 0.5 fresh, 0.5-4.9 oligohaline, 5-17.9 mesohaline, 18-  
609 29.9 polyhaline, 30-39.9 euhaline, > 40 hyperhaline  
610

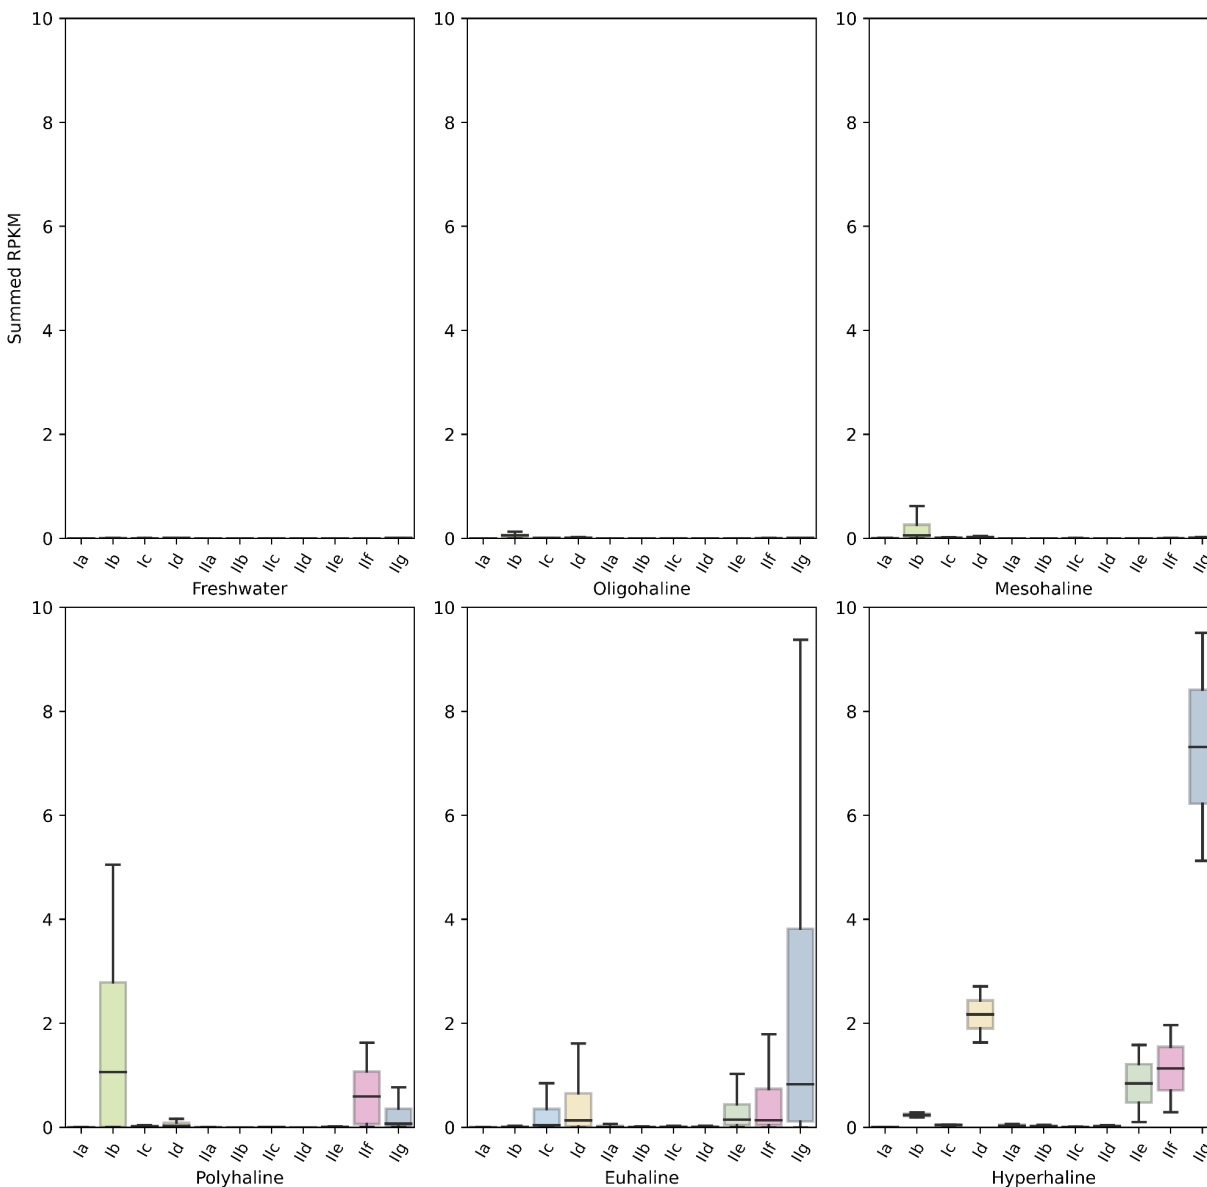

611  
612  
613  
614  
615  
616  
617  
618  
619  
620  
621

622  
623  
624  
625  
626

**Figure S4. Proteorhodopsin phylogeny.** Ultrafast bootstrap values (n=1000) are indicated on the branches and clades with AEGEAN-169 members are highlighted. Blue and green highlighting corresponds to spectral tuning of those groups, which are arbitrarily given Clade I-V names, whereas the red highlight for Clade VI indicates an undetermined function. Tree scale indicates changes per position according to the scale bar.

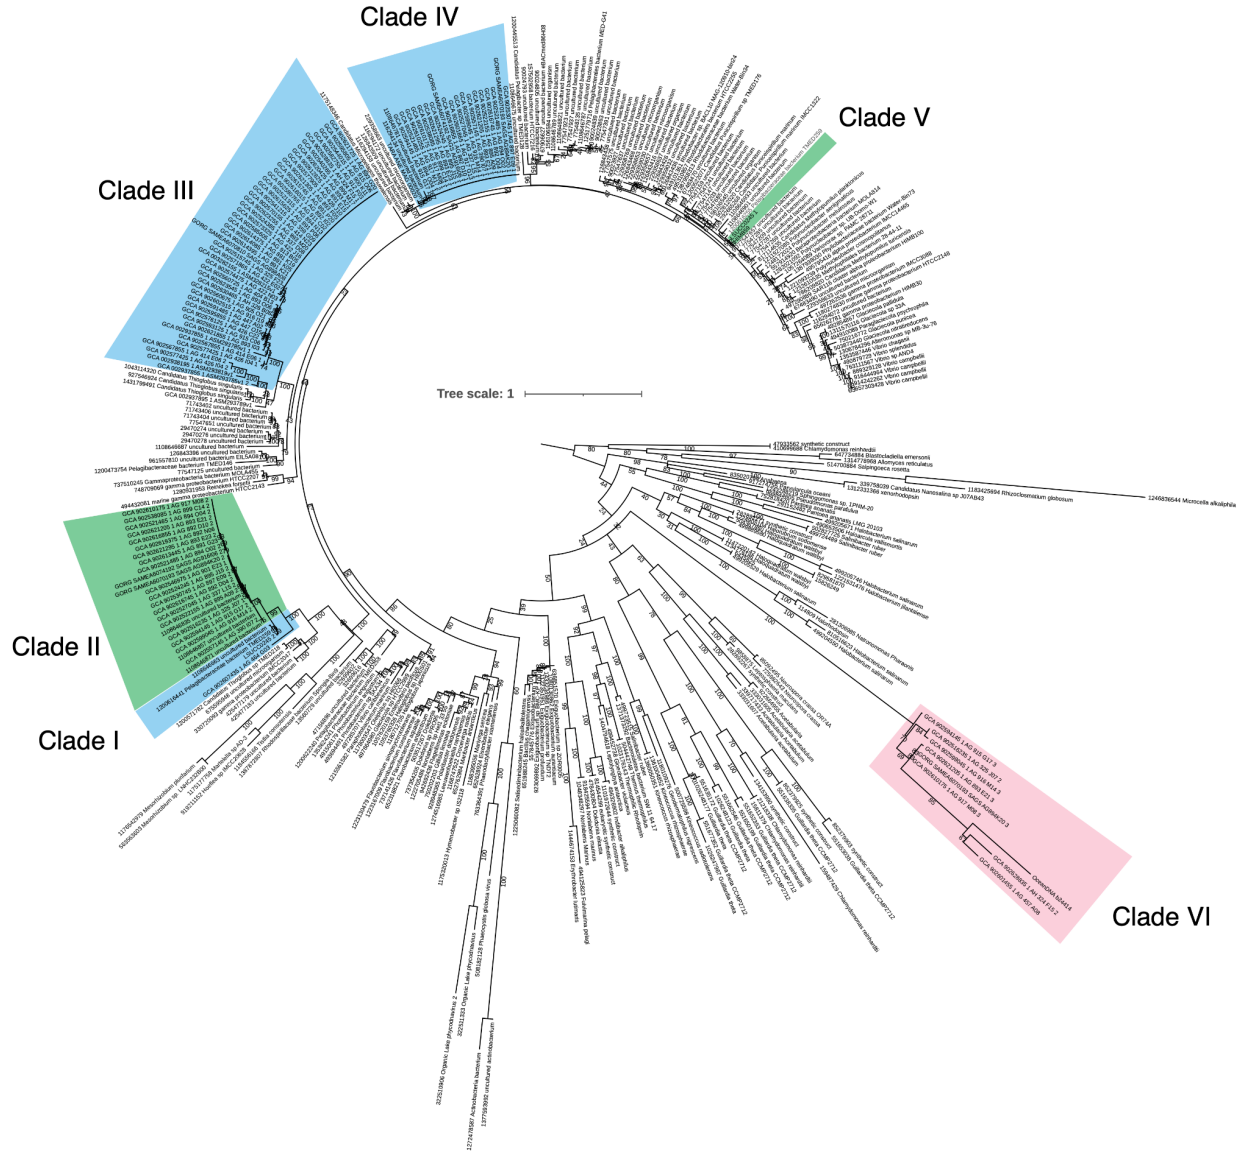

627  
628  
629  
630  
631  
632  
633  
634  
635  
636

637  
638  
639  
640  
641

**Figure S5. Growth data for LSUCC0245 temperature and salinity experiments.** These data underlie the computed rates in Fig. 5.

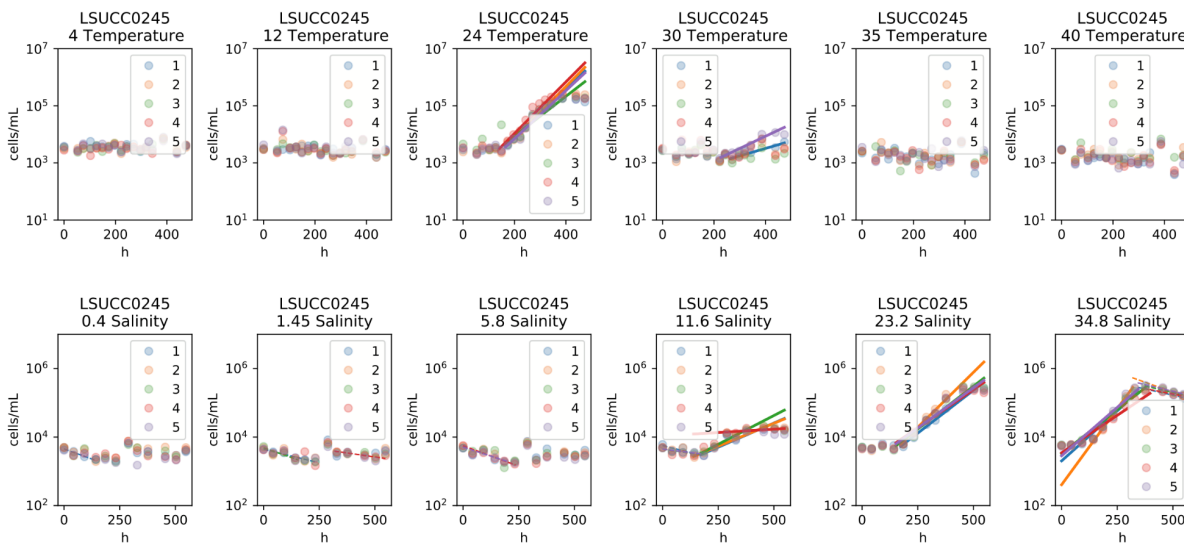

642  
643

644 **REFERENCES**

- 645 1. Giovannoni SJ. 2017. SAR11 Bacteria: The Most Abundant Plankton in the Oceans. *Ann Rev Mar*  
646 *Sci* 9:231–255.
- 647 2. Giovannoni SJ, Tripp HJ, Givan S, Podar M, Vergin KL, Baptista D, Bibbs L, Eads J, Richardson  
648 TH, Noordewier M, Rappé MS, Short JM, Carrington JC, Mathur EJ. 2005. Genome streamlining in  
649 a cosmopolitan oceanic bacterium. *Science* 309:1242–1245.
- 650 3. Grote J, Thrash JC, Huggett MJ, Landry ZC, Carini P, Giovannoni SJ, Rappé MS. 2012.  
651 Streamlining and core genome conservation among highly divergent members of the SAR11 clade.  
652 *MBio* 3.
- 653 4. Giovannoni SJ, Cameron Thrash J, Temperton B. 2014. Implications of streamlining theory for  
654 microbial ecology. *ISME J* 8:1553–1565.
- 655 5. Giovannoni SJ, Vergin KL. 2012. Seasonality in ocean microbial communities. *Science* 335:671–  
656 676.
- 657 6. Haro-Moreno JM, Rodriguez-Valera F, Rosselli R, Martinez-Hernandez F, Roda-Garcia JJ, Gomez  
658 ML, Fornas O, Martinez-Garcia M, López-Pérez M. 2020. Ecogenomics of the SAR11 clade.  
659 *Environ Microbiol* 22:1748–1763.
- 660 7. Vergin KL, Beszteri B, Monier A, Thrash JC, Temperton B, Treusch AH, Kilpert F, Worden AZ,  
661 Giovannoni SJ. 2013. High-resolution SAR11 ecotype dynamics at the Bermuda Atlantic Time-  
662 series Study site by phylogenetic placement of pyrosequences. *ISME J* 7:1322–1332.
- 663 8. Ruiz-Perez CA, Bertagnolli AD, Tsementzi D, Woyke T, Stewart FJ, Konstantinidis KT. 2021.  
664 Description of *Candidatus Mesopelagibacter carboxydoxydans* and *Candidatus Anoxipelagibacter*  
665 *denitrificans*: Nitrate-reducing SAR11 genera that dominate mesopelagic and anoxic marine zones.  
666 *Syst Appl Microbiol* 126185.
- 667 9. Tsementzi D, Wu J, Deutsch S, Nath S, Rodriguez-R LM, Burns AS, Ranjan P, Sarode N,  
668 Malmstrom RR, Padilla CC, Stone BK, Bristow LA, Larsen M, Glass JB, Thamdrup B, Woyke T,  
669 Konstantinidis KT, Stewart FJ. 2016. SAR11 bacteria linked to ocean anoxia and nitrogen loss.  
670 *Nature* 536:179–183.
- 671 10. Thrash JC, Cameron Thrash J, Temperton B, Swan BK, Landry ZC, Woyke T, DeLong EF,  
672 Stepanauskas R, Giovannoni SJ. 2014. Single-cell enabled comparative genomics of a deep ocean  
673 SAR11 bathytype. *The ISME Journal* <https://doi.org/10.1038/ismej.2013.243>.
- 674 11. Ferla MP, Thrash JC, Giovannoni SJ, Patrick WM. 2013. New rRNA gene-based phylogenies of the  
675 Alphaproteobacteria provide perspective on major groups, mitochondrial ancestry and phylogenetic  
676 instability. *PLoS One* 8:e83383.
- 677 12. Viklund J, Martijn J, Ettema TJG, Andersson SGE. 2013. Comparative and phylogenomic evidence  
678 that the alphaproteobacterium HIMB59 is not a member of the oceanic SAR11 clade. *PLoS One*  
679 8:e78858.
- 680 13. Martijn J, Vosseberg J, Guy L, Offre P, Ettema TJG. 2018. Deep mitochondrial origin outside the  
681 sampled alphaproteobacteria. *Nature* 557:101–105.

- 682 14. Muñoz-Gómez SA, Hess S, Burger G, Lang BF, Susko E, Slamovits CH, Roger AJ. 2019. An  
683 updated phylogeny of the Alphaproteobacteria reveals that the Rickettsiales and Holosporales have  
684 independent origins. *Elife* 8:e42535.
- 685 15. Moeseneder MM, Arrieta JM, Herndl GJ. 2005. A comparison of DNA- and RNA-based clone  
686 libraries from the same marine bacterioplankton community. *FEMS Microbiol Ecol* 51:341–352.
- 687 16. Yang C, Li Y, Zhou B, Zhou Y, Zheng W, Tian Y, Van Nostrand JD, Wu L, He Z, Zhou J, Zheng T.  
688 2015. Illumina sequencing-based analysis of free-living bacterial community dynamics during an  
689 Akashiwo sanguine bloom in Xiamen sea, China. *Sci Rep* 5:8476.
- 690 17. Cram JA, Xia LC, Needham DM, Sachdeva R, Sun F, Fuhrman JA. 2015. Cross-depth analysis of  
691 marine bacterial networks suggests downward propagation of temporal changes. *ISME J* 9:2573–  
692 2586.
- 693 18. Reintjes G, Tegetmeyer HE, Bürgisser M, Orlić S, Tews I, Zubkov M, Voß D, Zielinski O, Quast C,  
694 Glöckner FO, Amann R, Ferdelman TG, Fuchs BM. 2019. On-Site Analysis of Bacterial  
695 Communities of the Ultraoligotrophic South Pacific Gyre. *Appl Environ Microbiol* 85.
- 696 19. Allen R, Hoffmann LJ, Law CS, Summerfield TC. 2020. Subtle bacterioplankton community  
697 responses to elevated CO<sub>2</sub> and warming in the oligotrophic South Pacific gyre. *Environ Microbiol*  
698 *Rep* 12:377–386.
- 699 20. Šantić D, Piwosz K, Matić F, Vrdoljak Tomaš A, Arapov J, Dean JL, Šolić M, Koblížek M, Kušpilić  
700 G, Šestanović S. 2021. Artificial neural network analysis of microbial diversity in the central and  
701 southern Adriatic Sea. *Sci Rep* 11:11186.
- 702 21. Pachiadaki MG, Brown JM, Brown J, Bezuidt O, Berube PM, Biller SJ, Poulton NJ, Burkart MD, La  
703 Clair JJ, Chisholm SW, Stepanauskas R. 2019. Charting the Complexity of the Marine Microbiome  
704 through Single-Cell Genomics. *Cell* 179:1623–1635.e11.
- 705 22. van Bleijswijk JDL, Whalen C, Duineveld GCA, Lavaley MSS, Witte HJ, Mienis F. 2015.  
706 Microbial assemblages on a cold-water coral mound at the SE Rockall Bank (NE Atlantic):  
707 interactions with hydrography and topography. *Biogeosciences* 12:4483–4496.
- 708 23. Korlević M, Markovski M, Herndl GJ, Najdek M. 2022. Temporal variation in the prokaryotic  
709 community of a nearshore marine environment. *Sci Rep* 12:16859.
- 710 24. Steiner PA, Sintes E, Simó R, De Corte D, Pfannkuchen DM, Ivančić I, Najdek M, Herndl GJ. 2019.  
711 Seasonal dynamics of marine snow-associated and free-living demethylating bacterial communities  
712 in the coastal northern Adriatic Sea. *Environ Microbiol Rep* 11:699–707.
- 713 25. Tong F, Zhang P, Zhang X, Chen P. 2021. Impact of oyster culture on coral reef bacterioplankton  
714 community composition and function in Daya Bay, China. *Aquac Environ Interact* 13:489–503.
- 715 26. Li Y-Y, Chen X-H, Xie Z-X, Li D-X, Wu P-F, Kong L-F, Lin L, Kao S-J, Wang D-Z. 2018.  
716 Bacterial Diversity and Nitrogen Utilization Strategies in the Upper Layer of the Northwestern  
717 Pacific Ocean. *Front Microbiol* 9:797.
- 718 27. Acker M, Hogle SL, Berube PM, Hackl T, Coe A, Stepanauskas R, Chisholm SW, Repeta DJ. 2022.  
719 Phosphonate production by marine microbes: Exploring new sources and potential function. *Proc*  
720 *Natl Acad Sci U S A* 119:e2113386119.

- 721 28. Paoli L, Ruscheweyh H-J, Forneris CC, Hubrich F, Kautsar S, Bhushan A, Lotti A, Clayssen Q,  
722 Salazar G, Milanese A, Carlström CI, Papadopoulou C, Gehrig D, Karasikov M, Mustafa H,  
723 Larralde M, Carroll LM, Sánchez P, Zayed AA, Cronin DR, Acinas SG, Bork P, Bowler C, Delmont  
724 TO, Gasol JM, Gossert AD, Kahles A, Sullivan MB, Wincker P, Zeller G, Robinson SL, Piel J,  
725 Sunagawa S. 2022. Biosynthetic potential of the global ocean microbiome. *Nature* 607:111–118.
- 726 29. Nishimura Y, Yoshizawa S. 2022. The OceanDNA MAG catalog contains over 50,000 prokaryotic  
727 genomes originated from various marine environments. *Sci Data* 9:305.
- 728 30. Parks DH, Chuvochina M, Rinke C, Mussig AJ, Chaumeil P-A, Hugenholtz P. 2021. GTDB: an  
729 ongoing census of bacterial and archaeal diversity through a phylogenetically consistent, rank  
730 normalized and complete genome-based taxonomy. *Nucleic Acids Res*  
731 <https://doi.org/10.1093/nar/gkab776>.
- 732 31. Henson MW, Lanclos VC, Pitre DM, Weckhorst JL, Lucchesi AM, Cheng C, Temperton B, Thrash  
733 JC. 2020. Expanding the Diversity of Bacterioplankton Isolates and Modeling Isolation Efficacy  
734 with Large-Scale Dilution-to-Extinction Cultivation. *Appl Environ Microbiol* 86.
- 735 32. Henson MW, Pitre DM, Weckhorst JL, Lanclos VC, Webber AT, Thrash JC. 2016. Artificial  
736 Seawater Media Facilitate Cultivating Members of the Microbial Majority from the Gulf of Mexico.  
737 *mSphere* 1.
- 738 33. Lanclos VC, Rasmussen AN, Kojima CY, Cheng C, Henson MW, Faircloth BC, Francis CA, Thrash  
739 JC. 2023. Ecophysiology and genomics of the brackish water adapted SAR11 subclade IIIa. *ISME J*  
740 <https://doi.org/10.1038/s41396-023-01376-2>.
- 741 34. Bolger AM, Lohse M, Usadel B. 2014. Trimmomatic: a flexible trimmer for Illumina sequence data.  
742 *Bioinformatics* 30:2114–2120.
- 743 35. Bankevich A, Nurk S, Antipov D, Gurevich AA, Dvorkin M, Kulikov AS, Lesin VM, Nikolenko SI,  
744 Pham S, Prjibelski AD, Pyshkin AV, Sirotkin AV, Vyahhi N, Tesler G, Alekseyev MA, Pevzner PA.  
745 2012. SPAdes: a new genome assembly algorithm and its applications to single-cell sequencing. *J*  
746 *Comput Biol* 19:455–477.
- 747 36. Walker BJ, Abeel T, Shea T, Priest M, Abouelliel A, Sakthikumar S, Cuomo CA, Zeng Q, Wortman  
748 J, Young SK, Earl AM. 2014. Pilon: an integrated tool for comprehensive microbial variant  
749 detection and genome assembly improvement. *PLoS One* 9:e112963.
- 750 37. Li H, Durbin R. 2009. Fast and accurate short read alignment with Burrows-Wheeler transform.  
751 *Bioinformatics* 25:1754–1760.
- 752 38. Chen I-MA, Chu K, Palaniappan K, Pillay M, Ratner A, Huang J, Huntemann M, Varghese N,  
753 White JR, Seshadri R, Smirnova T, Kirton E, Jungbluth SP, Woyke T, Elloe-Fadrosh EA, Ivanova  
754 NN, Kyrpides NC. 2019. IMG/M v.5.0: an integrated data management and comparative analysis  
755 system for microbial genomes and microbiomes. *Nucleic Acids Research*  
756 <https://doi.org/10.1093/nar/gky901>.
- 757 39. Markowitz VM, Ivanova NN, Szeto E, Palaniappan K, Chu K, Dalevi D, Chen I-MA, Grechkin Y,  
758 Dubchak I, Anderson I, Lykidis A, Mavromatis K, Hugenholtz P, Kyrpides NC. 2008. IMG/M: a  
759 data management and analysis system for metagenomes. *Nucleic Acids Res* 36:D534–8.
- 760 40. Jain C, Rodriguez-R LM, Phillippy AM, Konstantinidis KT, Aluru S. 2018. High throughput ANI



- 761 analysis of 90K prokaryotic genomes reveals clear species boundaries. *Nat Commun* 9:5114.
- 762 41. Olm MR, Brown CT, Brooks B, Banfield JF. 2017. dRep: a tool for fast and accurate genomic  
763 comparisons that enables improved genome recovery from metagenomes through de-replication.  
764 *ISME J* 11:2864–2868.
- 765 42. Seemann T. 2017. barrnap: Bacterial ribosomal RNA predictor. Retrieved from 525.
- 766 43. Edgar RC. 2004. MUSCLE: multiple sequence alignment with high accuracy and high throughput.  
767 *Nucleic Acids Res* 32:1792–1797.
- 768 44. Minh BQ, Schmidt HA, Chernomor O, Schrempf D, Woodhams MD, von Haeseler A, Lanfear R.  
769 2020. IQ-TREE 2: New Models and Efficient Methods for Phylogenetic Inference in the Genomic  
770 Era. *Mol Biol Evol* 37:1530–1534.
- 771 45. Letunic I, Bork P. 2021. Interactive Tree Of Life (iTOL) v5: an online tool for phylogenetic tree  
772 display and annotation. *Nucleic Acids Res* 49:W293–W296.
- 773 46. Camacho C, Coulouris G, Avagyan V, Ma N, Papadopoulos J, Bealer K, Madden TL. 2009.  
774 BLAST+: architecture and applications. *BMC Bioinformatics* 10:421.
- 775 47. Parks DH, Imelfort M, Skennerton CT, Hugenholtz P, Tyson GW. 2015. CheckM: assessing the  
776 quality of microbial genomes recovered from isolates, single cells, and metagenomes. *Genome Res*  
777 25:1043–1055.
- 778 48. Getz EW, Tithi SS, Zhang L, Aylward FO. 2018. Parallel Evolution of Genome Streamlining and  
779 Cellular Bioenergetics across the Marine Radiation of a Bacterial Phylum. *MBio* 9.
- 780 49. Eren AM, Murat Eren A, Kiefl E, Shaiber A, Veseli I, Miller SE, Schechter MS, Fink I, Pan JN,  
781 Yousef M, Fogarty EC, Trigodet F, Watson AR, Esen ÖC, Moore RM, Clayssen Q, Lee MD,  
782 Kivenson V, Graham ED, Merrill BD, Karkman A, Blankenberg D, Eppley JM, Sjödin A, Scott JJ,  
783 Vázquez-Campos X, McKay LJ, McDaniel EA, Stevens SLR, Anderson RE, Fuessel J, Fernandez-  
784 Guerra A, Maignien L, Delmont TO, Willis AD. 2021. Community-led, integrated, reproducible  
785 multi-omics with anvi'o. *Nature Microbiology* <https://doi.org/10.1038/s41564-020-00834-3>.
- 786 50. Mistry J, Chuguransky S, Williams L, Qureshi M, Salazar GA, Sonnhammer ELL, Tosatto SCE,  
787 Paladin L, Raj S, Richardson LJ, Finn RD, Bateman A. 2021. Pfam: The protein families database in  
788 2021. *Nucleic Acids Res* 49:D412–D419.
- 789 51. Tatusov RL, Galperin MY, Natale DA, Koonin EV. 2000. The COG database: a tool for genome-  
790 scale analysis of protein functions and evolution. *Nucleic Acids Res* 28:33–36.
- 791 52. Kanehisa M, Sato Y, Kawashima M, Furumichi M, Tanabe M. 2016. KEGG as a reference resource  
792 for gene and protein annotation. *Nucleic Acids Res* 44:D457–62.
- 793 53. Kanehisa M, Sato Y, Morishima K. 2016. BlastKOALA and GhostKOALA: KEGG Tools for  
794 Functional Characterization of Genome and Metagenome Sequences. *J Mol Biol* 428:726–731.
- 795 54. Shaiber A, Willis AD, Delmont TO, Roux S, Chen L-X, Schmid AC, Yousef M, Watson AR, Lolans  
796 K, Esen ÖC, Lee STM, Downey N, Morrison HG, Dewhirst FE, Mark Welch JL, Eren AM. 2020.  
797 Functional and genetic markers of niche partitioning among enigmatic members of the human oral  
798 microbiome. *Genome Biol* 21:292.



- 799 55. Eren AM, Esen ÖC, Quince C, Vineis JH, Morrison HG, Sogin ML, Delmont TO. 2015. Anvi'o: an  
800 advanced analysis and visualization platform for 'omics data. *PeerJ* 3:e1319.
- 801 56. Buchfink B, Xie C, Huson DH. 2015. Fast and sensitive protein alignment using DIAMOND. *Nat*  
802 *Methods* 12:59–60.
- 803 57. Savoie ER, Lanclos VC, Henson MW, Cheng C, Getz EW, Barnes SJ, LaRowe DE, Rappé MS,  
804 Thrash JC. 2021. Ecophysiology of the Cosmopolitan OM252 Bacterioplankton  
805 (Gammaproteobacteria). *mSystems* e0027621.
- 806 58. Capella-Gutiérrez S, Silla-Martínez JM, Gabaldón T. 2009. trimAl: a tool for automated alignment  
807 trimming in large-scale phylogenetic analyses. *Bioinformatics* 25:1972–1973.
- 808 59. Ballesteros JA, Hormiga G. 2016. A New Orthology Assessment Method for Phylogenomic Data:  
809 Unrooted Phylogenetic Orthology. *Mol Biol Evol* 33:2117–2134.
- 810 60. Man D, Wang W, Sabehi G, Aravind L, Post AF, Massana R, Spudich EN, Spudich JL, Bèjà O.  
811 2003. Diversification and spectral tuning in marine proteorhodopsins. *EMBO J* 22:1725–1731.
- 812 61. Pesant S, Not F, Picheral M, Kandels-Lewis S, Le Bescot N, Gorsky G, Iudicone D, Karsenti E,  
813 Speich S, Troublé R, Dimier C, Searson S, Tara Oceans Consortium Coordinators. 2015. Open  
814 science resources for the discovery and analysis of Tara Oceans data. *Sci Data* 2:150023.
- 815 62. Alneberg J, Sundh J, Bennke C, Beier S, Lundin D, Hugerth LW, Pinhassi J, Kisand V, Riemann L,  
816 Jürgens K, Labrenz M, Andersson AF. 2018. BARM and BalticMicrobeDB, a reference  
817 metagenome and interface to meta-omic data for the Baltic Sea. *Sci Data* 5:180146.
- 818 63. Biller SJ, Berube PM, Dooley K, Williams M, Satinsky BM, Hackl T, Hogle SL, Coe A, Bergauer  
819 K, Bouman HA, Browning TJ, De Corte D, Hassler C, Hulston D, Jacquot JE, Maas EW, Reinthaler  
820 T, Sintes E, Yokokawa T, Chisholm SW. 2018. Marine microbial metagenomes sampled across  
821 space and time. *Sci Data* 5:180176.
- 822 64. Acinas SG, Sánchez P, Salazar G, Cornejo-Castillo FM, Sebastián M, Logares R, Sunagawa S,  
823 Hingamp P, Ogata H, Lima-Mendez G, Roux S, González JM, Arrieta JM, Alam IS, Kamau A,  
824 Bowler C, Raes J, Pesant S, Bork P, Agustí S, Gojobori T, Bajic V, Vaqué D, Sullivan MB, Pedrós-  
825 Alió C, Massana R, Duarte CM, Gasol JM. Metabolic Architecture of the Deep Ocean Microbiome  
826 <https://doi.org/10.1101/635680>.
- 827 65. Ahmed MA, Lim SJ, Campbell BJ. 2021. Metagenomes, Metatranscriptomes, and Metagenome-  
828 Assembled Genomes from Chesapeake and Delaware Bay (USA) Water Samples. *Microbiol Resour*  
829 *Announc* 10:e0026221.
- 830 66. Rasmussen AN, Francis CA. 2022. Genome-Resolved Metagenomic Insights into Massive Seasonal  
831 Ammonia-Oxidizing Archaea Blooms in San Francisco Bay. *mSystems* 7:e0127021.
- 832 67. Mende DR, Bryant JA, Aylward FO, Eppley JM, Nielsen T, Karl DM, DeLong EF. 2017.  
833 Environmental drivers of a microbial genomic transition zone in the ocean's interior. *Nature*  
834 *Microbiology* <https://doi.org/10.1038/s41564-017-0008-3>.
- 835 68. Fortunato CS, Crump BC. 2015. Microbial Gene Abundance and Expression Patterns across a River  
836 to Ocean Salinity Gradient. *PLoS One* 10:e0140578.
- 837 69. Acinas SG, Sánchez P, Salazar G, Cornejo-Castillo FM, Sebastián M, Logares R, Royo-Llonch M,

- 838 Paoli L, Sunagawa S, Hingamp P, Ogata H, Lima-Mendez G, Roux S, González JM, Arrieta JM,  
839 Alam IS, Kamau A, Bowler C, Raes J, Pesant S, Bork P, Agustí S, Gojobori T, Vaqué D, Sullivan  
840 MB, Pedrós-Alió C, Massana R, Duarte CM, Gasol JM. 2021. Deep ocean metagenomes provide  
841 insight into the metabolic architecture of bathypelagic microbial communities. *Communications*  
842 *Biology* <https://doi.org/10.1038/s42003-021-02112-2>.
- 843 70. Kojima CY, Getz EW, Thrash JC. 2022. RRAP: RPKM Recruitment Analysis Pipeline. *Microbiol*  
844 *Resour Announc* e0064422.
- 845 71. Langmead B. 2013. Bowtie2 manual. Dosegljivo: [https://github](https://github.com/BenLangmead/bowtie2/blob/master/MANUAL)  
846 [com/BenLangmead/bowtie2/blob/master/MANUAL](https://github.com/BenLangmead/bowtie2/blob/master/MANUAL), [Dostopano: 16 7 2018].
- 847 72. Li H, Handsaker B, Wysoker A, Fennell T, Ruan J, Homer N, Marth G, Abecasis G, Durbin R, 1000  
848 Genome Project Data Processing Subgroup. 2009. The Sequence Alignment/Map format and  
849 SAMtools. *Bioinformatics* 25:2078–2079.
- 850 73. Schlitzer R. 2002. Interactive analysis and visualization of geoscience data with Ocean Data View.  
851 *Comput Geosci* 28:1211–1218.
- 852 74. Thrash JC, Weckhorst JL, Pitre DM. 2015. Cultivating Fastidious Microbes, p. 57–78. *In* McGenity,  
853 TJ, Timmis, KN, Nogales, B (eds.), Springer Protocols Handbooks. Springer Berlin Heidelberg,  
854 Berlin, Heidelberg.
- 855 75. Yarza P, Yilmaz P, Pruesse E, Glöckner FO, Ludwig W, Schleifer K-H, Whitman WB, Euzéby J,  
856 Amann R, Rosselló-Móra R. 2014. Uniting the classification of cultured and uncultured bacteria and  
857 archaea using 16S rRNA gene sequences. *Nat Rev Microbiol* 12:635–645.
- 858 76. R Core Team. 2021. R: A Language and Environment for Statistical Computing. R Foundation for  
859 Statistical Computing, Vienna, Austria.
- 860 77. 隆伊藤. 1959. The Venice system for the classification of marine waters according to salinity :  
861 Symposium on the classification of brackish waters, Venice, 8-14 April 1958. *陸水学雑誌* 20:119–  
862 120.
- 863 78. Henson MW, Lanclos VC, Faircloth BC, Thrash JC. 2018. Cultivation and genomics of the first  
864 freshwater SAR11 (LD12) isolate. *ISME J* 12:1846–1860.
- 865 79. Tolbert NE, Zill LP. 1956. Excretion of glycolic acid by algae during photosynthesis. *J Biol Chem*  
866 222:895–906.
- 867 80. Wright RT, Shah NM. 1977. The trophic role of glycolic acid in coastal seawater. II. Seasonal  
868 changes in concentration and heterotrophic use in Ipswich Bay, Massachusetts, USA. *Mar Biol*  
869 43:257–263.
- 870 81. Haro-Moreno JM, López-Pérez M, Alekseev A, Podoliak E, Kovalev K, Gordeliy V, Stepanauskas  
871 R, Rodriguez-Valera F. 2023. Flotillin-Associated rhodopsin (FARhodopsin), a widespread paralog  
872 of proteorhodopsin in aquatic bacteria with streamlined genomes. *bioRxiv*.
- 873 82. Thrash JC, Boyd A, Huggett MJ, Grote J, Carini P, Yoder RJ, Robbertse B, Spatafora JW, Rappé  
874 MS, Giovannoni SJ. 2011. Phylogenomic evidence for a common ancestor of mitochondria and the  
875 SAR11 clade. *Scientific Reports* <https://doi.org/10.1038/srep00013>.

- 876 83. Carlson CA, Morris R, Parsons R, Treusch AH, Giovannoni SJ, Vergin K. 2009. Seasonal dynamics  
877 of SAR11 populations in the euphotic and mesopelagic zones of the northwestern Sargasso Sea.  
878 *ISME J* 3:283–295.
- 879 84. Treusch AH, Vergin KL, Finlay LA, Donatz MG, Burton RM, Carlson CA, Giovannoni SJ. 2009.  
880 Seasonality and vertical structure of microbial communities in an ocean gyre. *ISME J* 3:1148–1163.
- 881 85. Schattner M, Fuchs BM, Amann R, Zubkov MV, Tarran GA, Pernthaler J. 2009. Latitudinal  
882 distribution of prokaryotic picoplankton populations in the Atlantic Ocean. *Environ Microbiol*  
883 11:2078–2093.
- 884 86. Alonso-Sáez L, Balagué V, Sà EL, Sánchez O, González JM, Pinhassi J, Massana R, Pernthaler J,  
885 Pedrós-Alió C, Gasol JM. 2007. Seasonality in bacterial diversity in north-west Mediterranean  
886 coastal waters: assessment through clone libraries, fingerprinting and FISH. *FEMS Microbiol Ecol*  
887 60:98–112.
- 888 87. Mou X, Vila-Costa M, Sun S, Zhao W, Sharma S, Moran MA. 2011. Metatranscriptomic signature  
889 of exogenous polyamine utilization by coastal bacterioplankton. *Environ Microbiol Rep* 3:798–806.
- 890 88. Lu X, Sun S, Hollibaugh JT, Mou X. 2015. Identification of polyamine-responsive bacterioplankton  
891 taxa in South Atlantic Bight. *Environ Microbiol Rep* 7:831–838.
- 892 89. Noell SE, Barrell GE, Suffridge C, Morré J, Gable KP, Graff JR, VerWey BJ, Hellweger FL,  
893 Giovannoni SJ. 2021. SAR11 Cells Rely on Enzyme Multifunctionality To Metabolize a Range of  
894 Polyamine Compounds. *MBio* 12:e0109121.
- 895 90. Igarashi K, Kashiwagi K. 2010. Characteristics of cellular polyamine transport in prokaryotes and  
896 eukaryotes. *Plant Physiol Biochem* 48:506–512.
- 897 91. Hogle SL, Thrash JC, Dupont CL, Barbeau KA. 2016. Trace Metal Acquisition by Marine  
898 Heterotrophic Bacterioplankton with Contrasting Trophic Strategies. *Appl Environ Microbiol*  
899 82:1613–1624.
- 900 92. Kim S, Kang I, Lee J-W, Jeon CO, Giovannoni SJ, Cho J-C. 2021. Heme auxotrophy in abundant  
901 aquatic microbial lineages. *Proc Natl Acad Sci U S A* 118.
- 902 93. Buessecker S, Palmer M, Lai D, Dimapilis J, Mayali X, Mosier D, Jiao J-Y, Colman DR, Keller LM,  
903 St John E, Miranda M, Gonzalez C, Gonzalez L, Sam C, Villa C, Zhuo M, Bodman N, Robles F,  
904 Boyd ES, Cox AD, St Clair B, Hua Z-S, Li W-J, Reysenbach A-L, Stott MB, Weber PK, Pett-Ridge  
905 J, Dekas AE, Hedlund BP, Dodsworth JA. 2022. An essential role for tungsten in the ecology and  
906 evolution of a previously uncultivated lineage of anaerobic, thermophilic Archaea. *Nat Commun*  
907 13:3773.
- 908 94. Kletzin A, Adams MW. 1996. Tungsten in biological systems. *FEMS Microbiol Rev* 18:5–63.
- 909 95. Coimbra C, Farias P, Branco R, Morais PV. 2017. Tungsten accumulation by highly tolerant marine  
910 hydrothermal *Sulfitobacter dubius* strains carrying a *tupBCA* cluster. *Syst Appl Microbiol* 40:388–  
911 395.
- 912 96. Ferry JG. 1990. Formate dehydrogenase. *FEMS Microbiol Rev* 7:377–382.
- 913 97. Carini P, Campbell EO, Morré J, Sañudo-Wilhelmy SA, Thrash JC, Bennett SE, Temperton B,  
914 Begley T, Giovannoni SJ. 2014. Discovery of a SAR11 growth requirement for thiamin's pyrimidine

- 915 precursor and its distribution in the Sargasso Sea. ISME J 8:1727–1738.
- 916 98. Cheng C, Thrash JC. 2021. sparse-growth-curve: a Computational Pipeline for Parsing Cellular  
917 Growth Curves with Low Temporal Resolution. Microbiol Resour Announc 10.
- 918
